# Supplementary material for: Iodine-mediated C–N and C–S bond formation: regioselective synthesis of benzo[4,5]imidazo[2,1-b]thiazoles
Source: Royal Society of Chemistry journal article supplement (doi:10.1039/c6nj02102f), 2016-11-03
Supplement: c6nj02102f1.pdf [file c6nj02102f1.pdf]

### Supporting information

## Iodine -Mediated C-N and C-S bond formation: Regioselective synthesis of benzo [4,5]imidazo [2,1-*b*] thiazoles.

Sethurajan Ambethkar<sup>a</sup>, Muthalu Vellimalai<sup>b</sup>, Vediappen Padmini<sup>a\*</sup>, Nattamai Bhuvanesh<sup>c</sup>

<sup>a,b</sup>Department of Organic Chemistry, School of Chemistry, Madurai Kamaraj University, Madurai-625021, Tamilnadu, India.

<sup>c</sup>Department of Chemistry, Texas A&M University, College Station, USA, TX 77842

\*Correspondence author e-mail: padmini.chem@mku.org & padimini\_tamilenthi@yahoo.co.in

| Table of contents                             | page no |
|-----------------------------------------------|---------|
| General methods                               | 4       |
| Analytical data                               | 5-9     |
| Figure S1. <sup>1</sup> H spectrum of SA-1.   | 10      |
| Figure S2. <sup>13</sup> C spectrum of SA-1.  | 10      |
| Figure S3. DEPT-135 spectrum of SA-1.         | 11      |
| Figure S4. ESI-MASS Spectrum of SA-1.         | 11      |
| Figure S5. <sup>1</sup> H spectrum of SA-2.   | 12      |
| Figure S6. <sup>13</sup> C spectrum of SA-2.  | 12      |
| Figure S7. HRM spectrum of SA-2.              | 13      |
| Figure S8. <sup>1</sup> H spectrum of SA-3.   | 13      |
| Figure S9. <sup>13</sup> C spectrum of SA-3.  | 14      |
| Figure S10. <sup>1</sup> H spectrum of SA-4.  | 14      |
| Figure S11. <sup>13</sup> C spectrum of SA-4. | 15      |
| Figure S12. ESI-MASS Spectrum of SA-4.        | 15      |
| Figure S13. <sup>1</sup> H spectrum of SA-5.  | 16      |
| Figure S14. <sup>13</sup> C spectrum of SA-5. | 16      |

|                                        |    |
|----------------------------------------|----|
| Figure S15.ESI-MASS Spectrum of SA-5.  | 17 |
| Figure S16.1H spectrum of SA-6.        | 17 |
| Figure S17.13C spectrum of SA-6.       | 18 |
| Figure S18.ESI-MASS Spectrum of SA-6.  | 18 |
| Figure S19.1H spectrum of SA-7.        | 19 |
| Figure S20.13C spectrum of SA-7.       | 19 |
| Figure S21.ESI-MASS Spectrum of SA-7.  | 20 |
| Figure S22.1H spectrum of SA-8.        | 20 |
| Figure S23.13C spectrum of SA-8.       | 21 |
| Figure S24.ESI-MASS Spectrum of SA-8.  | 21 |
| Figure S25.1H spectrum of SA-9.        | 22 |
| Figure S26.13C spectrum of SA-9.       | 22 |
| Figure S27.ESI-MASS Spectrum of SA-9.  | 23 |
| Figure S28.1H spectrum of SA-10.       | 23 |
| Figure S29.13C spectrum of SA-10.      | 24 |
| Figure S30.ESI-MASS Spectrum of SA-10. | 24 |
| Figure S31.1H spectrum of SA-11.       | 25 |
| Figure S32.13C spectrum of SA-11.      | 25 |
| Figure S33.ESI-MASS Spectrum of SA-11. | 26 |
| Figure S34.1H spectrum of SA-12.       | 26 |
| Figure S35.13C spectrum of SA-12.      | 27 |
| Figure S36.1H spectrum of SA-13.       | 27 |
| Figure S37.13C spectrum of SA-13.      | 28 |
| Figure S38.ESI-MASS Spectrum of SA-13. | 28 |
| Figure S39.1H spectrum of SA-14.       | 29 |
| Figure S40.13C spectrum of SA-14.      | 29 |
| Figure S41.1H spectrum of SA-15.       | 30 |
| Figure S42.13C spectrum of SA-15.      | 30 |

|                                                                                                    |       |
|----------------------------------------------------------------------------------------------------|-------|
| Figure S43.ESI-MASS Spectrum of SA-15.                                                             | 31    |
| Figure S44.1H spectrum of SA-16.                                                                   | 31    |
| Figure S45.13C spectrum of SA-16.                                                                  | 32    |
| Figure S46.ESI-MASS Spectrum of SA-16.                                                             | 32    |
| Figure.S47 ORTEP diagram of SA-2.                                                                  | 33    |
| Table S1. Crystal data and structure refinement<br>for PTB_151206_A1_MB1plus.                      | 33-34 |
| Table S2. Atomic coordinates ( $\times 10^4$ ) and equivalent<br>isotropic displacement parameters | 35    |
| Table S3. Bond length and bond angles<br>for PTB_151206_A1_MB1plus.                                | 36-38 |
| Figure.S48 ORTEP diagram of SA-6.                                                                  | 38    |
| Table S4. Crystal data and structure refinement<br>for PTB_151206_A1_2MB14Fea.                     | 39    |
| Table S2. Atomic coordinates ( $\times 10^4$ ) and equivalent<br>isotropic displacement parameters | 40    |
| Table S3. Bond length and bond angles<br>for PTB_151206_A1_MB1plus.                                | 41-43 |

## 1. General methods

The melting points were measured in open capillary tubes and are uncorrected. The  $^1\text{H}$  and  $^{13}\text{C}$  NMR spectra were recorded on a Bruker (Avance) 300 MHz NMR instrument using TMS as internal standard either  $\text{CDCl}_3$  or  $\text{DMSO-d}_6$  as solvent. Chemical shifts are given in parts per million ( $\delta$ -scale) and the coupling constants are given in hertz (Hz). Silica gel-G plates (Merck) were used for thin layer chromatography (TLC) analysis with a mixture of petroleum ether (60-80 °C) and ethyl acetate as eluent. The single crystal X-ray data were collected on BRUKER GADDS X-ray (three-circle) diffractometer with Mo  $\text{K}\alpha$  ( $\lambda = 1.5418 \text{ \AA}$ ) radiation. Elemental analyses were performed on a vario EL III CHNS elemental analyzer. Mass spectra were recorded in LCQ Fleet mass spectrometer, Thermo Fisher Instruments Limited, US. Electrospray ionization mass spectrometry (ESI-MS) analysis was performed in the positive ion and negative ion mode on a liquid chromatography ion trap.

## 2. General experimental procedure for SA-1:

A mixture of 2-mercaptobenzimidazole 1 (1.0 equiv), (E)-1-(4-aryl)-3-(dimethylamino)-prop-2-en-1-one 2 (1.0 equiv), and iodine (1.0equiv) was added to 5 mL of acetic acid under open air at room temperature for 2 h. The completion of the reaction was monitored by TLC. After completion of the reaction, the reaction mixture was poured into water and workup with sodium thiosulfate and the solution was extracted with ethyl acetate. The combined organic phase was dried over  $\text{Na}_2\text{SO}_4$  and then the solvent was removed. The crude sample was purified by column chromatography.

### 3. Spectral data

#### benzo[4,5]imidazo[2,1-*b*]thiazol-2-yl(phenyl)methanone (SA-1)

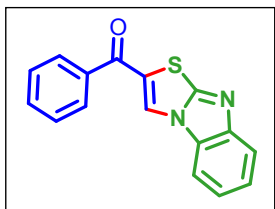

White solid, mp; 142-44 °C; <sup>1</sup>H NMR (300 MHz, CDCl<sub>3</sub>) δ: 8.22 (s, 1H), 7.86 (d, *J* = 8.1 Hz, 2H), 7.77 (d, *J* = 8.1 Hz, 1H), 7.67 (t, *J* = 7.5 Hz, 2H), 7.57 (t, *J* = 7.8 Hz, 2H), 7.41 (t, *J* = 7.2 Hz, 1H), 7.28 (t, *J* = 7.2 Hz, 1H) ppm; <sup>13</sup>C NMR (75 MHz, CDCl<sub>3</sub>) δ: 187.2, 156.7, 148.6, 137.0, 133.1, 130.0, 129.5, 129.0,

#### benzo[4,5]imidazo[2,1-*b*]thiazol-2-yl(*p*-tolyl)methanone (SA-2)

128.7, 125.1, 122.0, 122.0, 119.7, 110.8 ppm. MS *m/z* 279.1 (M+1)<sup>+</sup>. Anal. Calcd for C<sub>16</sub>H<sub>10</sub>N<sub>2</sub>O<sub>2</sub>S: C, 69.05; H, 3.62; N, 10.07; found C, 69.01; H, 3.59; N, 10.04.

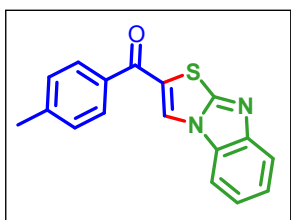

White solid, mp; 155-57 °C; <sup>1</sup>H NMR (300 MHz, CDCl<sub>3</sub>) δ: 8.21 (s, 1H), 7.77 (d, *J* = 8.1 Hz, 3H), 7.64 (d, *J* = 8.1 Hz, 1H), 7.42-7.34 (m, 3H), 7.26 (t, *J* = 7.5 Hz, 1H), 2.47 (s, 3H) ppm; <sup>13</sup>C NMR (75 MHz, CDCl<sub>3</sub>) δ: 186.8, 156.7, 148.5, 144.0, 134.3, 130.2, 129.7, 128.8, 125.0, 121.9, 119.6, 110.7, 21.79 ppm. MS *m/z* 292.3560 (M)<sup>+</sup>. Anal. Calcd for C<sub>17</sub>H<sub>12</sub>N<sub>2</sub>OS: C, 69.84; H, 4.14; N, 9.58; found C, 69.81; H, 4.11; N, 9.54.

#### benzo[4,5]imidazo[2,1-*b*]thiazol-2-yl(4-nitrophenyl)methanone (SA-3)

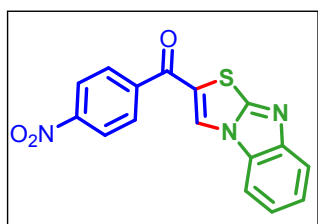

Yellow solid, mp; 190-92 °C; <sup>1</sup>H NMR (300 MHz, CDCl<sub>3</sub>) δ: 8.73 (s, 1H), 8.54 (d, *J* = 8.1 Hz, 2H), 8.28 (s, 1H), 8.23 (d, *J* = 8.1 Hz, 2H), 7.82 (m, 2H), 7.72 (d, *J* = 8.1 Hz, 1H), 7.48 (t, *J* = 7.8 Hz, 1H), 7.34 (t, *J* = 7.8 Hz, 1H) ppm; <sup>13</sup>C NMR (75 MHz, CDCl<sub>3</sub>) δ: 185.6, 150.7, 128.5, 124.7, 123.3, 121.5, 120.1, 119.7, 117.6, 116.6, 114.2, 105.1, 104.6 ppm. MS *m/z* 323.03 (M+1)<sup>+</sup>. Anal. Calcd for C<sub>16</sub>H<sub>9</sub>N<sub>3</sub>O<sub>3</sub>S: C, 59.44; H, 2.81; N, 13.00; found C, 59.41; H, 2.78; N, 12.97.

#### benzo[4,5]imidazo[2,1-*b*]thiazol-2-yl(4-chlorophenyl)methanone (SA-4)

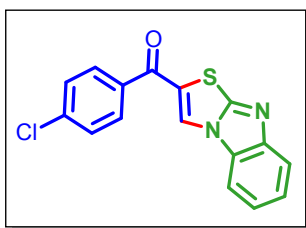

White solid, mp; 177-79 °C;  $^1\text{H}$  NMR (300 MHz,  $\text{CDCl}_3$ )  $\delta$ : 8.25 (s, 1H), 7.83-7.63 (m, 3H), 7.68 (d,  $J = 7.8$  Hz, 1H), 7.53 (d,  $J = 7.5$  Hz, 2H), 7.43 (t,  $J = 7.5$  Hz, 1H), 7.30 (t,  $J = 7.5$  Hz, 1H) ppm;  $^{13}\text{C}$  NMR (75 MHz,  $\text{CDCl}_3$ )  $\delta$ : 185.9, 156.6, 148.6, 139.5, 135.2, 130.0, 129.7, 129.5, 129.34, 125.4, 125.2, 122.1, 119.7, 110.8 ppm. MS  $m/z$  313.18 ( $\text{M}+1$ ) $^+$ . Anal. Calcd for  $\text{C}_{16}\text{H}_9\text{ClN}_2\text{OS}$ : C, 61.44; H, 2.90; N, 8.96; found C, 61.41; H, 2.88; N, 8.93.

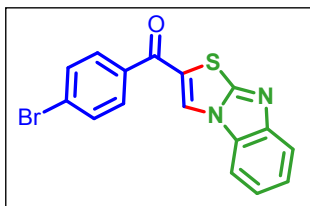

**benzo[4,5]imidazo[2,1-*b*]thiazol-2-yl(4-bromophenyl)methanone (SA-5)**

White solid, mp; 208-10 °C;  $^1\text{H}$  NMR (300 MHz,  $\text{CDCl}_3$ )  $\delta$ : 8.64 (s, 1H), 7.74 (d,  $J = 7.8$  Hz, 1H), 7.62 (d,  $J = 8.7$  Hz, 2H), 7.56-7.52 (m, 3H), 7.24 (t,  $J = 8.1$  Hz, 1H) 7.10 (t,  $J = 8.1$  Hz, 1H) ppm;  $^{13}\text{C}$  NMR (75 MHz,  $\text{CDCl}_3$ )  $\delta$ : 185.6, 155.8, 147.2, 135.0, 131.7, 130.0, 129.2, 129.0, 127.4, 127.2, 124.7, 121.7, 118.5, 111.5 ppm. MS  $m/z$  357.0 ( $\text{M}+1$ ) $^+$ . Anal. Calcd for  $\text{C}_{16}\text{H}_9\text{BrN}_2\text{OS}$ : C, 53.80; H, 2.54; N, 7.54; found C, 53.77; H, 2.51; N, 7.51.

**benzo[4,5]imidazo[2,1-*b*]thiazol-2-yl(4-fluorophenyl)methanone (SA-6)**

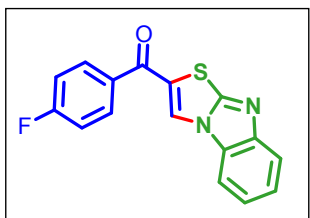

White solid, mp; 180-82°C;  $^1\text{H}$  NMR (300 MHz,  $\text{CDCl}_3$ )  $\delta$ : 8.43 (s, 1H), 7.42-7.38 (m, 3H), 7.07 (d,  $J = 7.8$  Hz, 1H) 6.79 (t,  $J = 7.8$  Hz, 1H), 6.75 - 6.66 (m, 3H) ppm;  $^{13}\text{C}$  NMR (75 MHz,  $\text{CDCl}_3$ )  $\delta$ : 184.2, 164.1 (d,  $^1J_{\text{C-F}} = 251.8$  Hz), 155.0, 146.8, 131.9, 130.4 (d,  $^3J_{\text{C-F}} = 9$  Hz), 128.7, 127.9, 126.8, 123.7, 120.7, 117.6, 114.8 (d,  $^2J_{\text{C-F}} = 21.8$  Hz), 111.1 ppm. MS  $m/z$  297.13 ( $\text{M}+1$ ) $^+$ . Anal. Calcd for  $\text{C}_{16}\text{H}_9\text{FN}_2\text{OS}$ : C, 64.85; H, 3.06; N, 9.45; found C, 64.81; H, 3.03; N, 9.41.

**benzo[4,5]imidazo[2,1-*b*]thiazol-2-yl(3-bromophenyl)methanone (SA-7)**

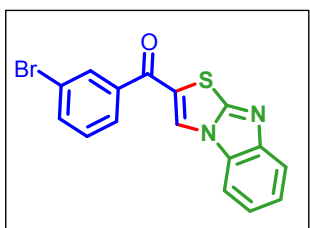

White solid, mp; 163-65 °C;  $^1\text{H}$  NMR (300 MHz,  $\text{CDCl}_3$ )  $\delta$ : 8.38 (s, 1H), 8.11(s, 1H), 7.91 (d,  $J = 7.8$  Hz, 2H), 7.85 (d,  $J = 7.8$  Hz, 1H), 7.60 - 7.55 (m, 2H), 7.45 (t,  $J = 7.5$  Hz, 1H) ppm;  $^{13}\text{C}$  NMR (75 MHz,  $\text{CDCl}_3$ )  $\delta$ : 185.6, 138.8, 136.0, 131.6, 130.7, 129.8, 127.2, 125.6, 125.5, 123.3, 122.4, 119.8,

111.1 ppm. MS  $m/z$  358.98 ( $M+1$ )<sup>+</sup>. Anal. Calcd for C<sub>16</sub>H<sub>9</sub>BrN<sub>2</sub>OS: C, 53.80; H, 2.54; N, 7.84; found C, 53.76; H, 2.51; N, 7.81.

**[1,1'-biphenyl]-4-yl(benzo[4,5]imidazo[2,1-*b*]thiazol-2-yl)methanone (SA-8)**

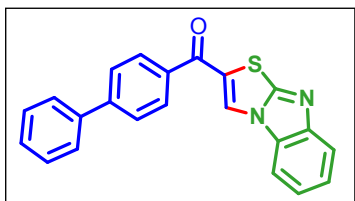

Brown solid, mp; 157-59 °C; <sup>1</sup>H NMR (300 MHz, CDCl<sub>3</sub>) δ: 8.41 (s, 1H), 8.07 (d,  $J = 7.8$  Hz, 2H), 7.92-7.87 (m, 3H), 7.83-7.73 (m, 3H), 7.64-7.51 (m, 4H), 7.43 (t,  $J = 7.5$  Hz, 1H) ppm; <sup>13</sup>C NMR (75 MHz, CDCl<sub>3</sub>) δ: 186.9, 157.3, 148.9, 146.3, 139.9, 136.0, 130.6, 129.6, 129.4, 129.4, 128.8, 127.9, 127.6, 127.6, 125.4, 122.3, 120.0, 111.1 ppm. MS  $m/z$  353.07 ( $M-1$ )<sup>-</sup>. Anal. Calcd for C<sub>22</sub>H<sub>14</sub>N<sub>2</sub>OS: C, 74.55; H, 3.98; N, 7.90; found C, 74.52; H, 3.95; N, 7.87.

**benzo[4,5]imidazo[2,1-*b*]thiazol-2-yl(naphthalen-1-yl)methanone (SA-9)**

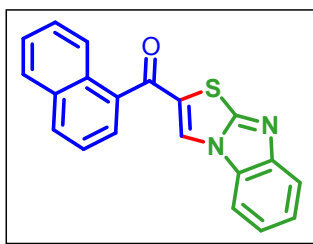

White solid, mp; 203-05 °C; <sup>1</sup>H NMR (300 MHz, CDCl<sub>3</sub>) δ: 8.17 (s, 1H), 8.08 (d,  $J = 8.1$  Hz, 1H), 7.95-7.93 (m, 1H), 7.83 (t,  $J = 7.5$  Hz, 2H), 7.66 (m, 4H), 7.46 (t,  $J = 7.5$  Hz, 1H), 7.32 (t,  $J = 7.5$  Hz, 1H) ppm; <sup>13</sup>C NMR (75 MHz, CDCl<sub>3</sub>) δ: 188.2, 134.4, 134.0, 133.0, 132.3, 130.4, 129.1, 128.6, 128.0, 127.3, 127.1, 126.6, 125.8, 125.1, 124.4, 122.7, 119.0, 111.2 ppm. MS  $m/z$  329.11 ( $M+1$ )<sup>+</sup>. Anal. Calcd for C<sub>20</sub>H<sub>12</sub>N<sub>2</sub>OS: C, 73.15; H, 3.68; N, 8.53; found C, 73.12; H, 3.66; N, 8.50.

**benzo[4,5]imidazo[2,1-*b*]thiazol-2-yl(naphthalen-2-yl)methanone (SA-10)**

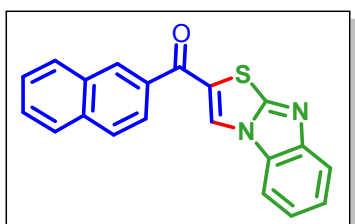

White solid, mp; 212-14 °C; <sup>1</sup>H NMR (300 MHz, CDCl<sub>3</sub>) δ: 8.43 (s, 1H), 8.33 (s, 1H), 8.06-8.03 (m, 2H), 7.97 (t,  $J = 7.8$  Hz, 1H), 7.84 (d,  $J = 7.8$  Hz, 1H), 7.72-7.64 (m, 3H), 7.47 (t,  $J = 7.8$  Hz, 1H), 7.31 (t,  $J = 7.8$  Hz, 1H), 7.32 (t,  $J = 7.5$  Hz, 1H) ppm; <sup>13</sup>C NMR (75 MHz, CDCl<sub>3</sub>) δ: 191.8, 161.2, 152.7, 140.1, 138.9, 137.2, 135.2, 134.5, 133.7, 133.5, 132.6, 132.0, 129.8, 129.5, 126.8, 123.6, 117.2 ppm. MS  $m/z$  329.09 ( $M+1$ )<sup>+</sup>. Anal. Calcd for C<sub>20</sub>H<sub>12</sub>N<sub>2</sub>OS: C, 73.15; H, 3.68; N, 8.53; found C, 73.11; H, 3.65; N, 8.50.

**benzo[4,5]imidazo[2,1-*b*]thiazol-2-yl(4-methoxyphenyl)methanone (SA-11)**

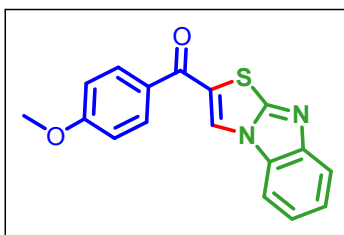

White solid, mp; 161-63 °C;  $^1\text{H}$  NMR (300 MHz,  $\text{CDCl}_3$ )  $\delta$ : 8.25 (s, 1H), 7.91(d,  $J = 8.4$  Hz, 2H), 7.81 (d,  $J = 8.4$  Hz, 1H), 7.69 (d,  $J = 7.8$  Hz, 1H), 7.42 (t,  $J = 7.5$  Hz, 1H), 7.06 (d,  $J = 8.4$  Hz, 2H), 7.31 (t,  $J = 7.5$  Hz, 1H), 3.92 (s, 3H) ppm;  $^{13}\text{C}$  NMR (75 MHz,  $\text{CDCl}_3$ )  $\delta$ :185.6, 163.7, 156.5, 148.4, 131.0, 130.2, 129.5, 124.9, 124.5, 121.9, 119.5, 114.2, 110.8, 55.6 ppm. MS  $m/z$  309.13 ( $\text{M}+1$ ) $^+$ . Anal. Calcd for  $\text{C}_{17}\text{H}_{12}\text{N}_2\text{O}_2\text{S}$ : C, 66.22; H, 3.92; N, 9.08; found C, 66.18; H, 3.89; N, 9.04.

#### benzo[4,5]imidazo[2,1-*b*]thiazol-2-yl(3-methoxyphenyl)methanone (SA-12)

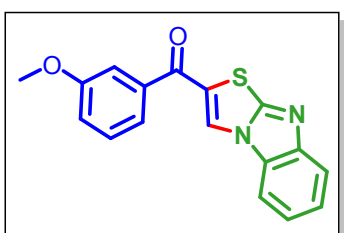

White solid, mp; 170-72 °C;  $^1\text{H}$  NMR (300 MHz,  $\text{CDCl}_3$ )  $\delta$ : 8.29 (s, 1H), 8.01 (s, 1H), 7.79 (d,  $J = 7.8$  Hz, 1H), 7.70 (d,  $J = 7.8$  Hz, 1H), 7.58 (d,  $J = 7.5$  Hz, 1H), 7.44 (broad, 2H), 7.29 (t,  $J = 7.5$  Hz, 1H), 6.99 (d,  $J = 7.8$  Hz, 1H), 3.97 (s, 3H) ppm;  $^{13}\text{C}$  NMR (75 MHz,  $\text{CDCl}_3$ )  $\delta$ :185.6, 153.6, 149.6, 130.0, 129.7, 125.0, 124.5, 123.2, 121.9, 119.7, 113.3, 110.7, 110.3, 56.2 ppm. Anal. Calcd for  $\text{C}_{17}\text{H}_{12}\text{N}_2\text{O}_2\text{S}$ : C, 66.22; H, 3.92; N, 9.08; found C, 66.18; H, 3.89; N, 9.04.

#### benzo[4,5]imidazo[2,1-*b*]thiazol-2-yl(3,4-dimethoxyphenyl)methanone (SA-13)

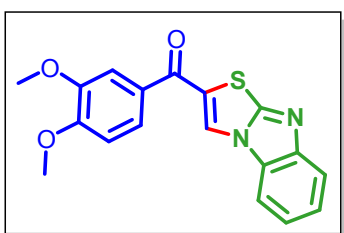

White solid, mp; 127-29 °C;  $^1\text{H}$  NMR (300 MHz,  $\text{CDCl}_3$ )  $\delta$ : 8.29 (s, 1H), 7.80 (d,  $J = 8.1$  Hz, 1H), 7.70 (d,  $J = 7.8$  Hz, 1H), 7.58 (d,  $J = 7.5$  Hz, 1H), 7.44 (broad, 2H), 7.29 (t,  $J = 7.5$  Hz, 1H), 6.99 (d,  $J = 7.8$  Hz, 1H), 4.00 (s, 3H), 3.97 (s, 3H) ppm;  $^{13}\text{C}$  NMR (75 MHz,  $\text{CDCl}_3$ )  $\delta$ :185.7, 156.8, 153.6, 149.7, 148.5, 130.1, 129.8, 129.6, 125.0, 124.5, 123.3, 122.0, 119.7, 111.3, 110.8, 110.3, 56.3, 56.3 ppm. MS  $m/z$  339.30 ( $\text{M}+1$ ) $^+$ . Anal. Calcd for  $\text{C}_{18}\text{H}_{14}\text{N}_2\text{O}_3\text{S}$ : C, 63.89; H, 4.17; N, 8.28; found C, 63.86; H, 4.15; N, 8.25.

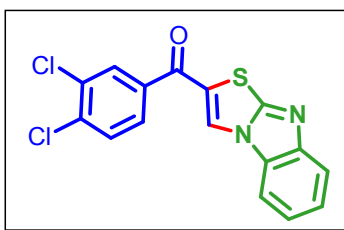

#### benzo[4,5]imidazo[2,1-*b*]thiazol-2-yl(3,4-dichlorophenyl)methanone (SA-14)

Yellow solid, mp; 127-29 °C;  $^1\text{H}$  NMR (300 MHz,  $\text{CDCl}_3$ )  $\delta$ : 8.26 (s, 1H), 7.96 (s, 1H), 7.80 (d,  $J = 8.1$  Hz, 1H), 7.72



- 7.64 (m, 3H), 7.46 (t,  $J = 7.5$  Hz, 1H), 7.34 (t,  $J = 7.5$  Hz, 1H) ppm;  $^{13}\text{C}$  NMR (75 MHz,  $\text{CDCl}_3$ )  $\delta$ : 184.7, 156.6, 148.8, 137.8, 136.7, 133.9, 131.2, 130.6, 129.6, 129.4, 127.7, 125.6, 125.4, 122.3, 120.0, 110.9 ppm. Anal. Calcd for  $\text{C}_{16}\text{H}_8\text{Cl}_2\text{N}_2\text{OS}$ : C, 55.35; H, 2.32; N, 8.07; found C, 55.31; H, 2.30; N, 8.04.

**benzo[4,5]imidazo[2,1-*b*]thiazol-2-yl(thiophen-2-yl)methanone (SA-15)**

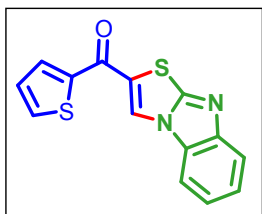

Yellow solid, mp; 185-87 °C;  $^1\text{H}$  NMR (300 MHz,  $\text{CDCl}_3$ )  $\delta$ : 8.52 (s, 1H), 7.96 (d,  $J = 3.9$  Hz, 1H), 7.80 (t,  $J = 8.1$  Hz, 2H), 7.74 (d,  $J = 7.8$  Hz, 1H), 7.44 (t,  $J = 7.8$  Hz, 1H), 7.35 (t,  $J = 7.8$  Hz, 1H), 7.28 (m, 1H) ppm;  $^{13}\text{C}$  NMR (75 MHz,  $\text{CDCl}_3$ )  $\delta$ : 177.6, 156.5, 148.6, 141.3, 134.2, 132.9, 129.6, 129.3, 128.5, 125.1, 123.8, 122.1, 119.7, 110.9 ppm. MS  $m/z$  285.0 ( $\text{M}+1$ ) $^+$ . Anal. Calcd for  $\text{C}_{14}\text{H}_8\text{N}_2\text{OS}_2$ : C, 62.85; H, 3.23; N, 8.93; found C, 62.82; H, 3.20; N, 8.90.

**benzo[4,5]imidazo[2,1-*b*]thiazol-2-yl(5-bromothiophen-2-yl)methanone (SA-16)**

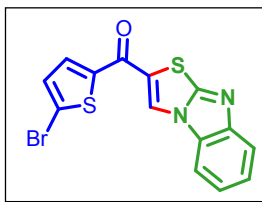

Yellow solid, mp; 178-80 °C;  $^1\text{H}$  NMR (300 MHz,  $\text{CDCl}_3$ )  $\delta$ : 8.47 (s, 1H), 8.89 (d,  $J = 8.4$  Hz, 1H), 7.73 (d,  $J = 8.1$  Hz, 1H), 7.69 (d,  $J = 4.2$  Hz, 1H), 7.42 (t,  $J = 7.8$  Hz, 1H), 7.31 (t,  $J = 7.8$  Hz, 1H), 7.22 (d,  $J = 4.2$  Hz, 1H) ppm;  $^{13}\text{C}$  NMR (75 MHz,  $\text{CDCl}_3$ )  $\delta$ : 176.3, 156.3, 148.7, 142.9, 133.0, 131.6, 129.6, 128.5, 125.3, 123.8, 123.4, 122.2, 119.9, 110.9 ppm. MS  $m/z$  364.9 ( $\text{M}+1$ ) $^+$ . Anal. Calcd for  $\text{C}_{14}\text{H}_7\text{BrN}_2\text{OS}_2$ : C, 46.29; H, 1.94; N, 7.71; found C, 46.26; H, 1.92; N, 7.68.



Figure S2. <sup>13</sup>C spectrum of SA-1.

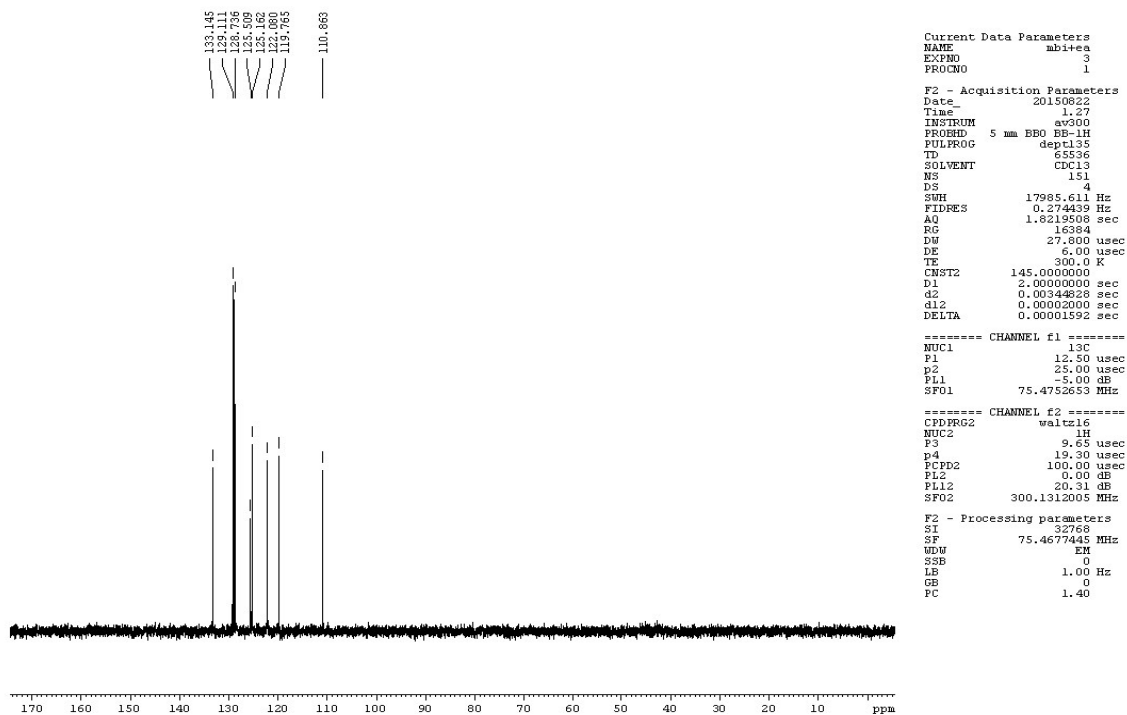

Figure S3. DEPT-135 spectrum of SA-1.

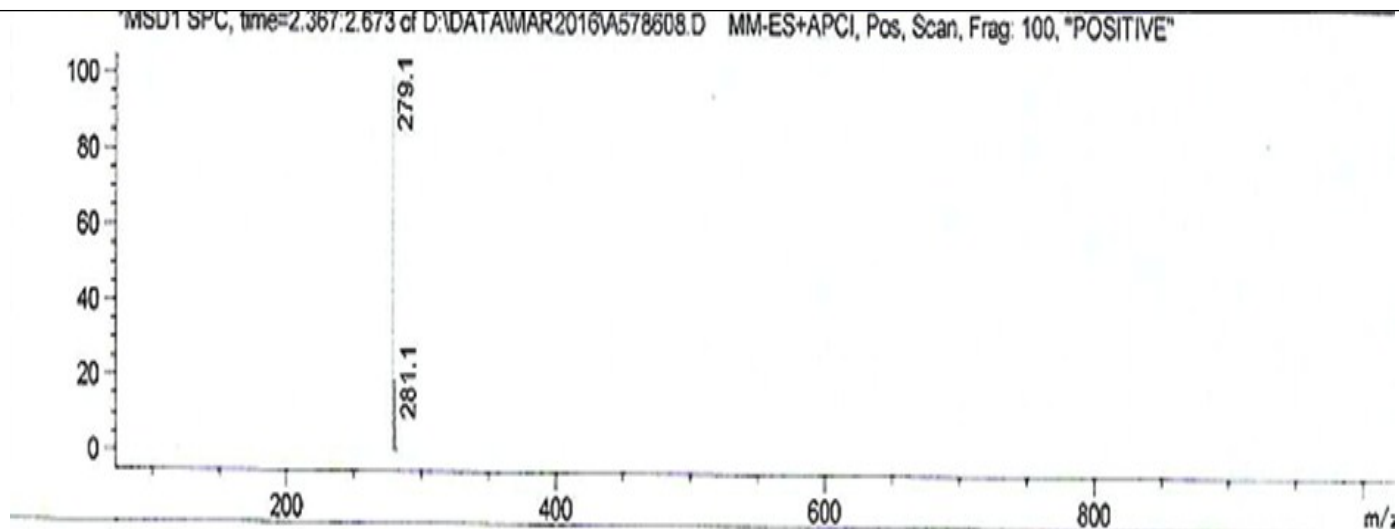

Figure S4. ESI-MASS Spectrum of SA-1.

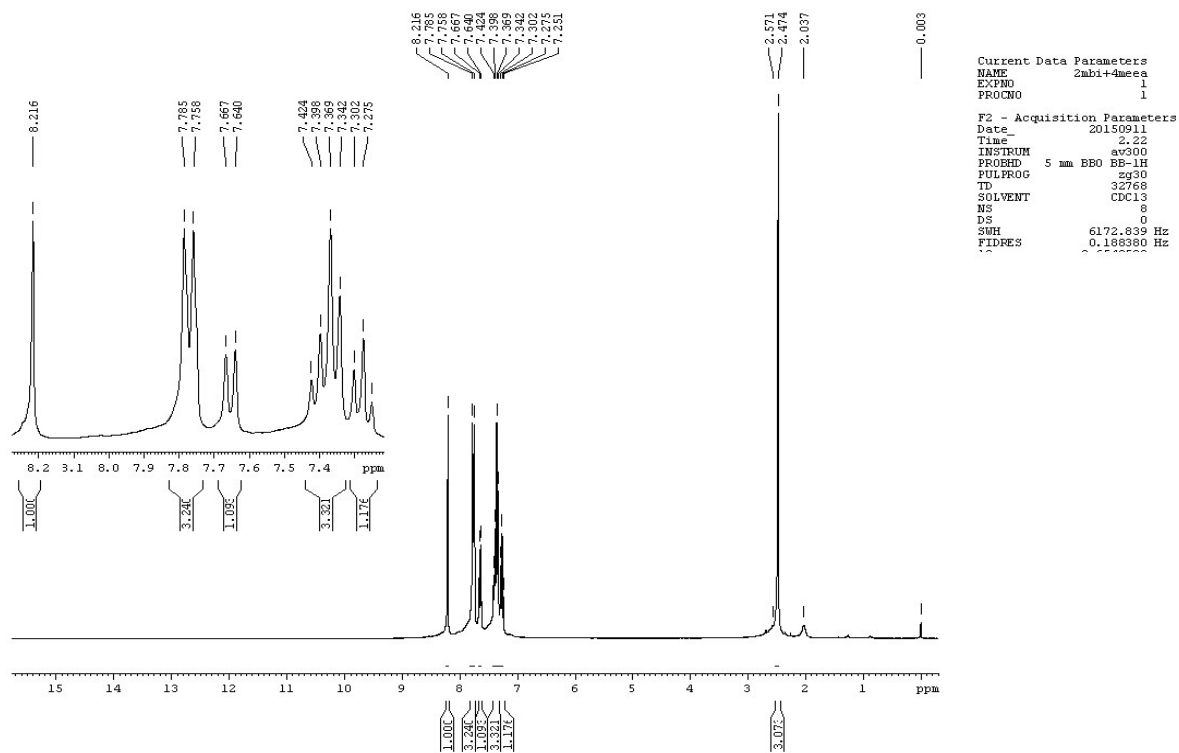

Figure S5. <sup>1</sup>H spectrum of SA-2.

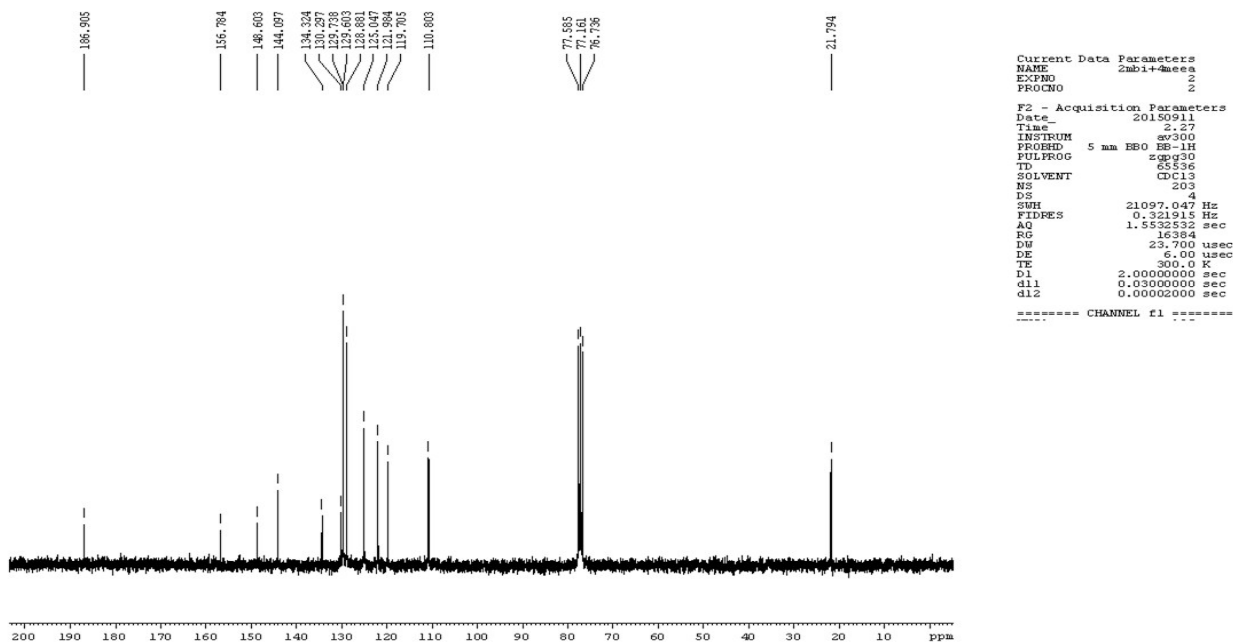

Figure S6. <sup>13</sup>C spectrum of SA-2.



Figure S8. <sup>1</sup>H spectrum of SA-3.

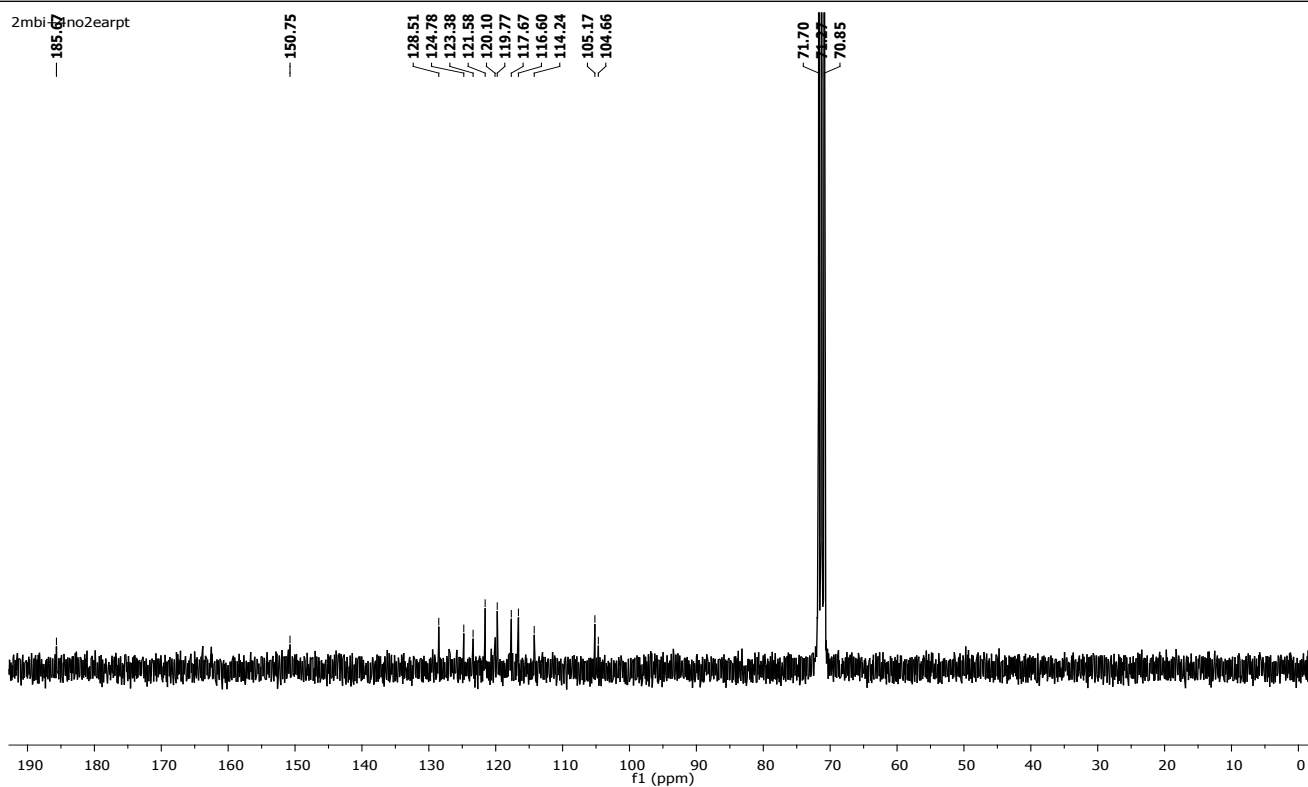

Figure S9. <sup>13</sup>C spectrum of SA-3.

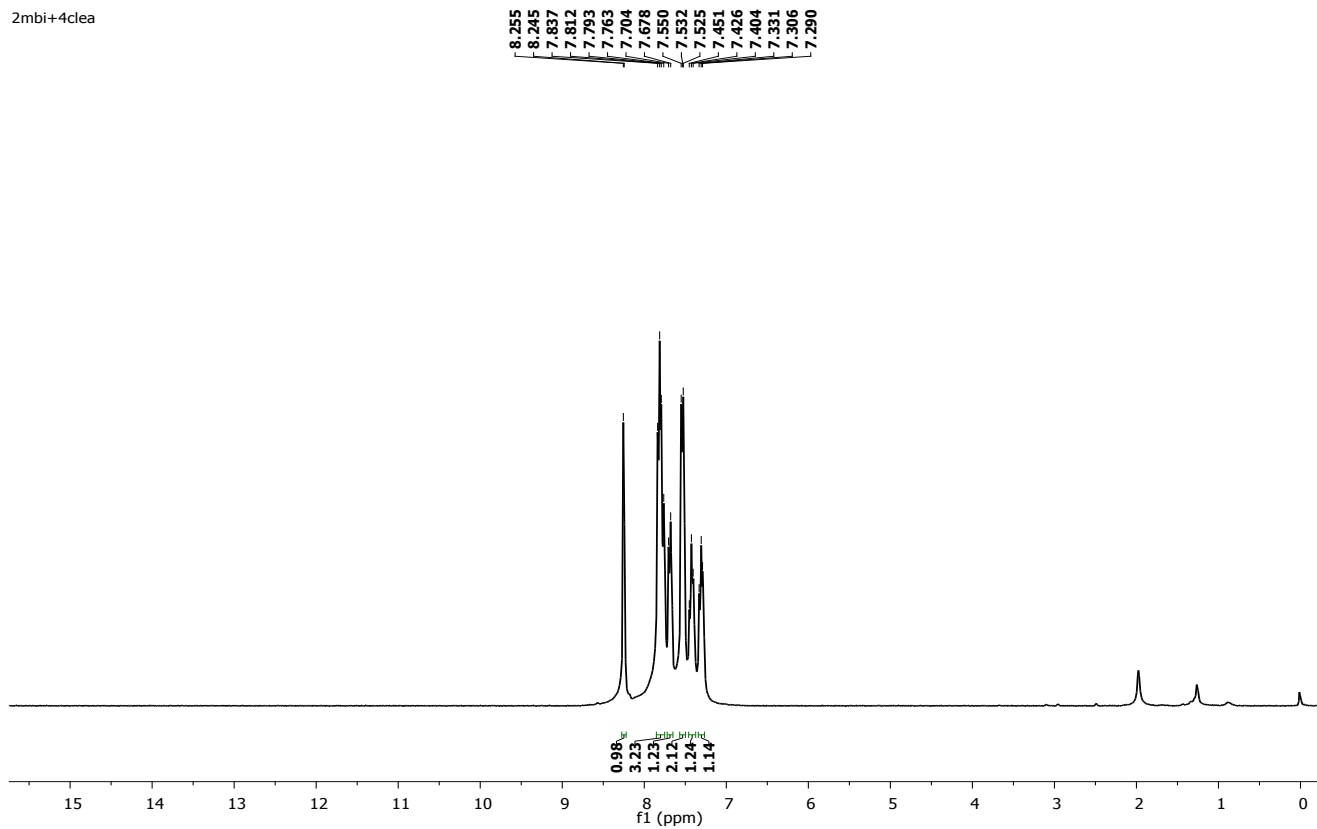

Figure S10. <sup>1</sup>H spectrum of SA-4.

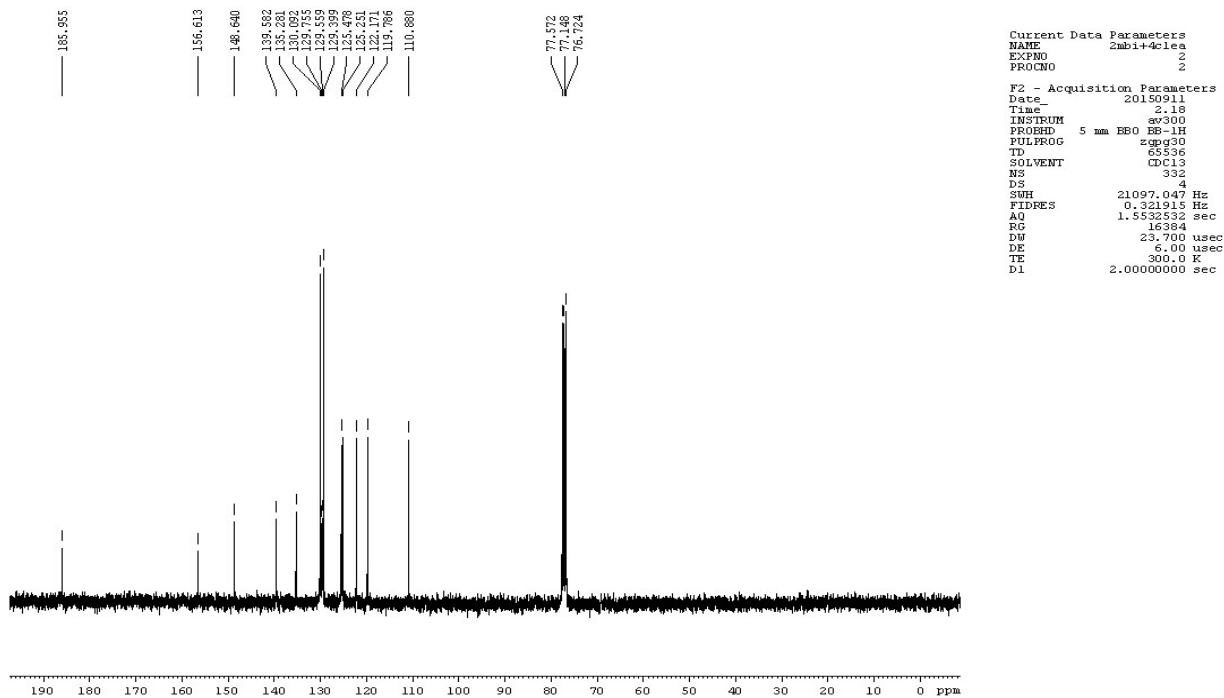

Figure S11. <sup>13</sup>C spectrum of SA-4.

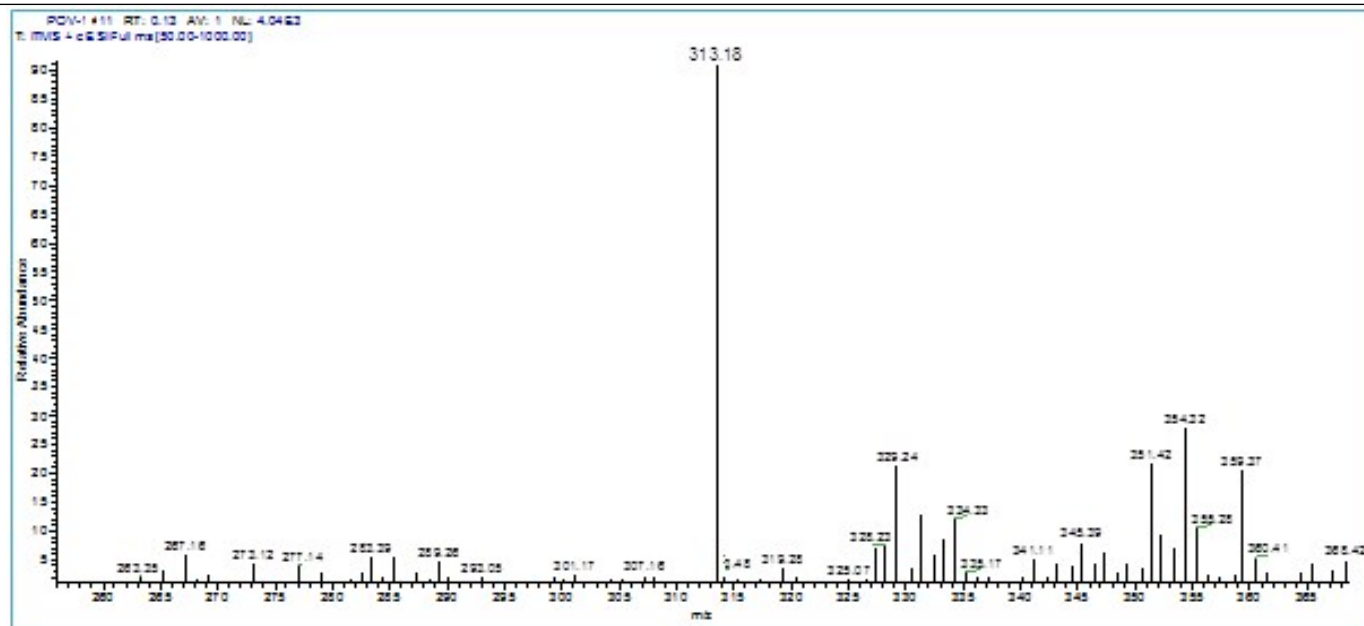

Figure S12. ESI-MASS Spectrum of SA-4.

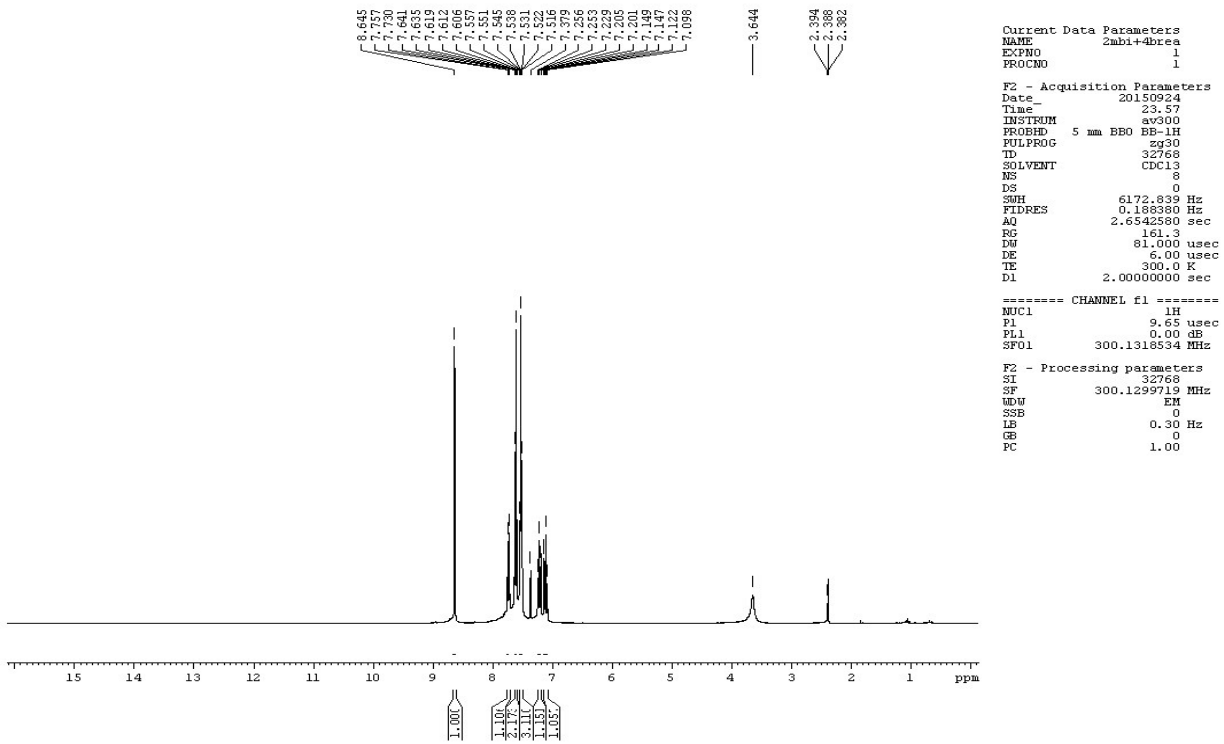

Figure S13. <sup>1</sup>H spectrum of SA-5.

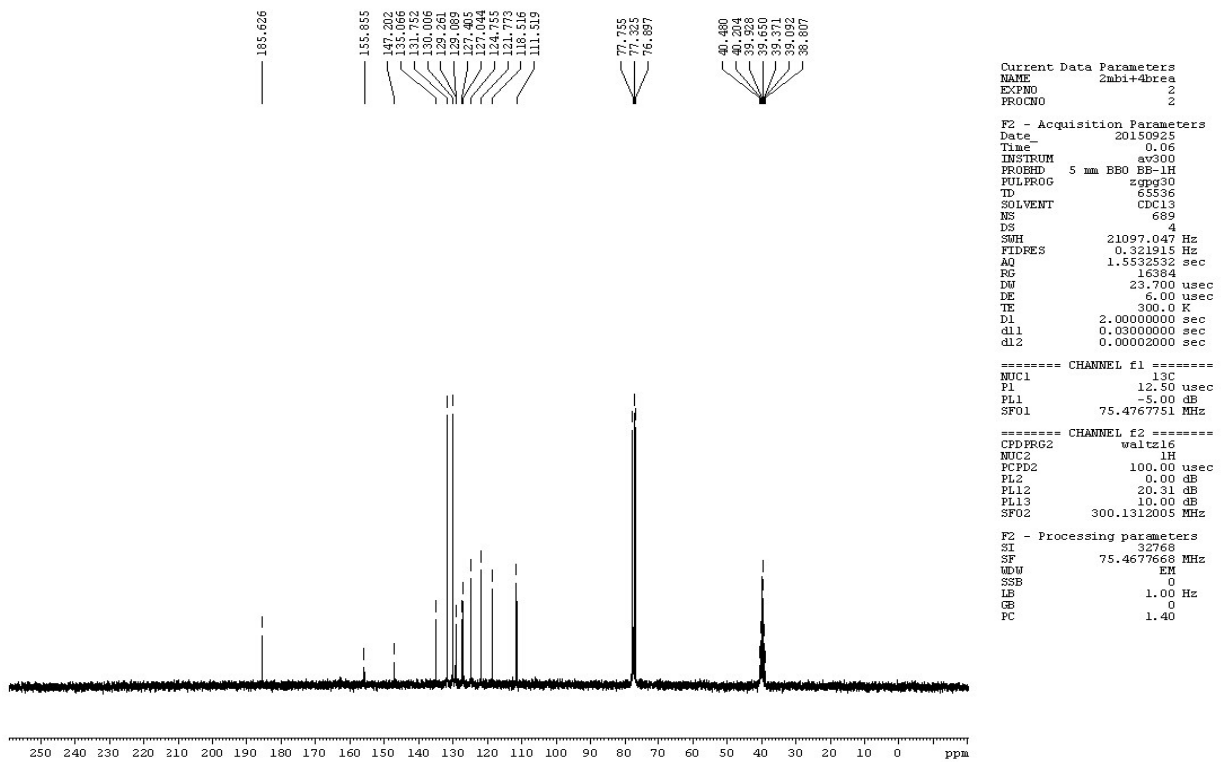

Figure S14. <sup>13</sup>C spectrum of SA-5.



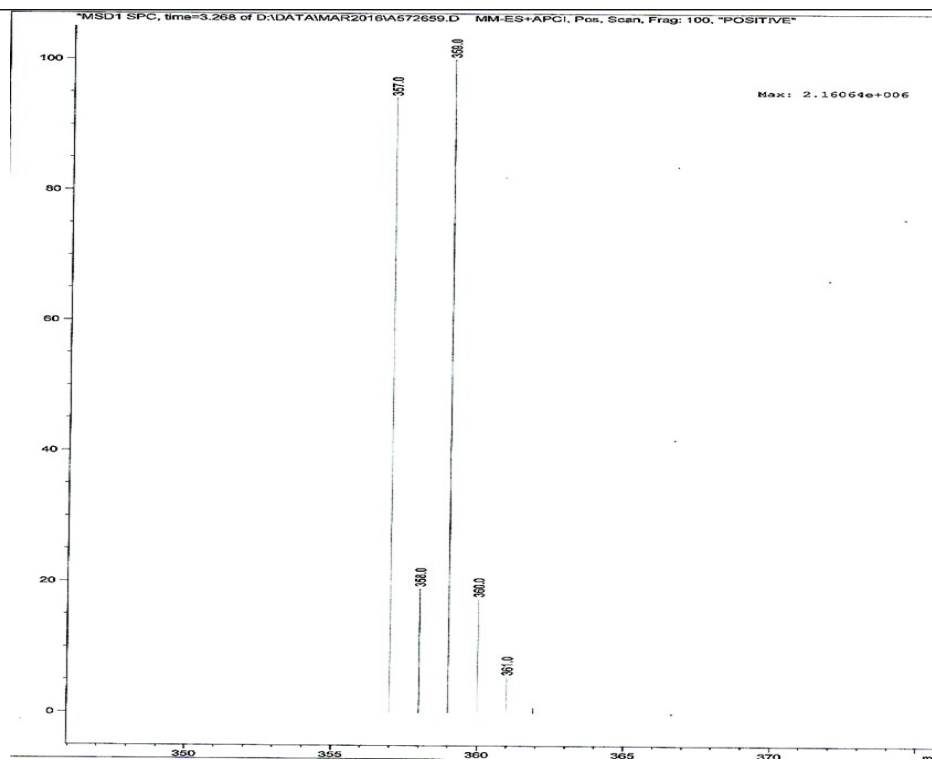

Figure S15.ESI-MASS Spectrum of SA-5.

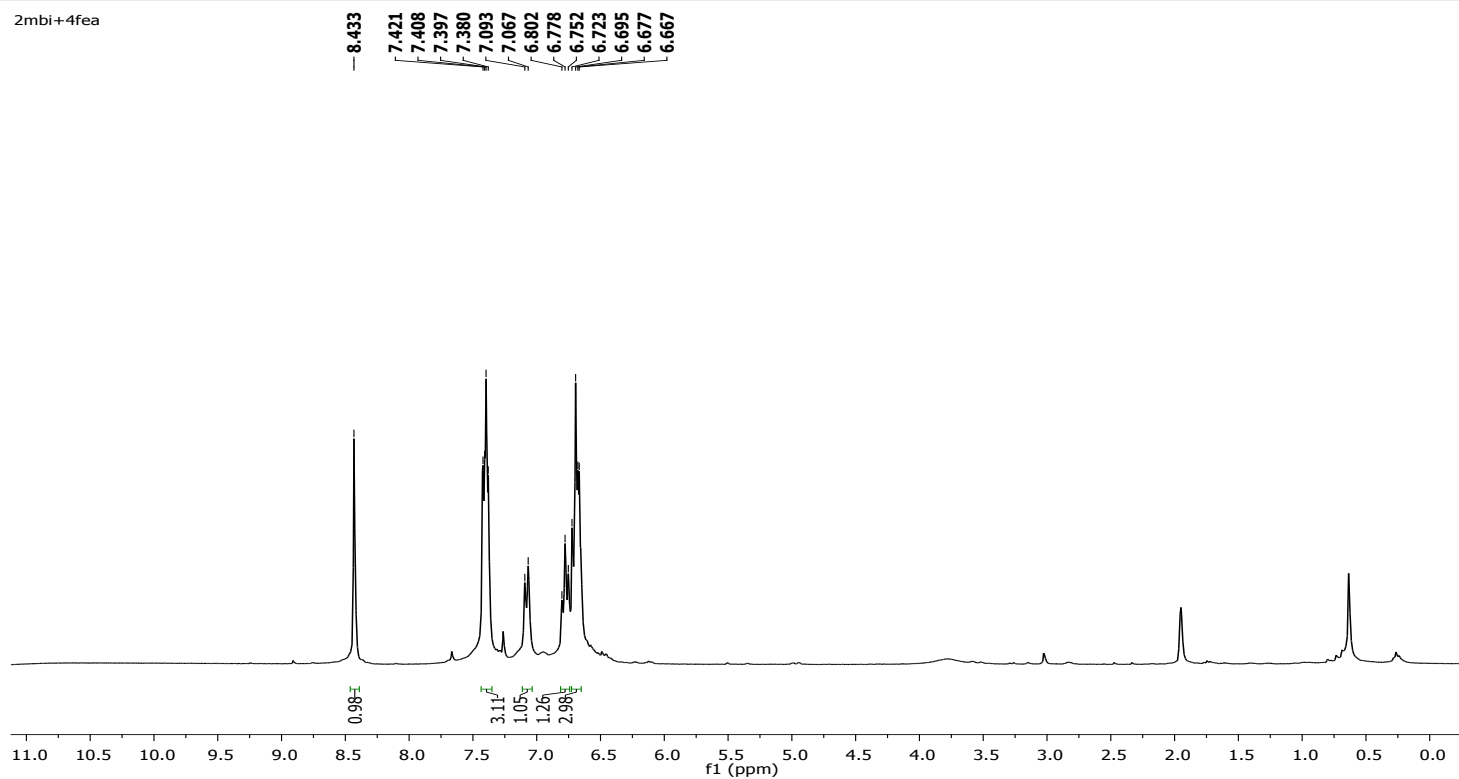

Figure S16. <sup>1</sup>H spectrum of SA-6.

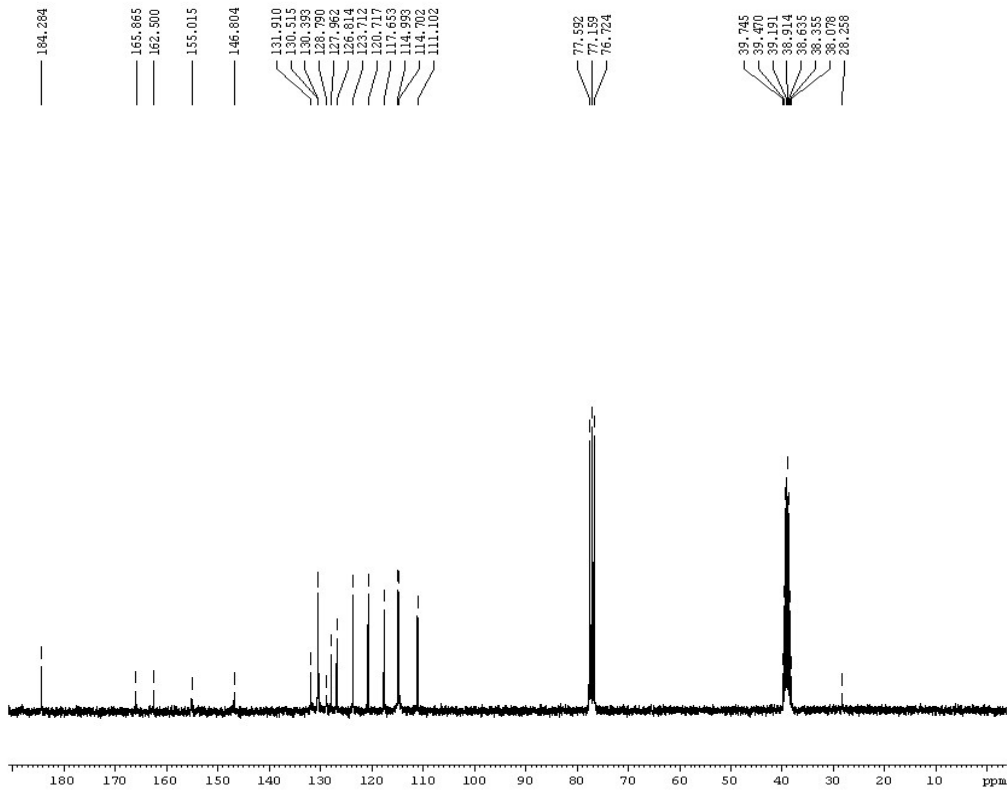

```

Current Data Parameters
NAME      2mb1+4Fea
EXPNO    2
PROCNO   2

F2 - Acquisition Parameters
Date_    20151019
Time     23.15
INSTRUM  sv300
PROBHD   5 mm BBO BB-1H
PULPROG  zgpg30
TD       65536
SOLVENT  CDCl3
NS       1000
DS       4
SFO1     21097.047 Hz
FIDRES   0.321915 Hz
AQ       1.532532 sec
RG       16384
DM       23.700 usec
DE       6.00 usec
TE       300.0 K
D1       2.00000000 sec
d11      0.03000000 sec
d12      0.00002000 sec

===== CHANNEL f1 =====
NUC1     13C
P1       12.50 usec
PL1     -5.00 dB
SFO1     75.4767751 MHz

===== CHANNEL f2 =====
CPDPRG2  waltz16
NUC2     1H
PTD2     100.00 usec
PL2      0.00 dB
PL12     20.31 dB
PL13     10.00 dB
SFO2     300.1312005 MHz

F2 - Processing parameters
SI       32768
SF       75.4682041 MHz
WDW      EM
SSB      0
LE       1.00 Hz
GB       0
PC       1.40

```

Figure S17. <sup>13</sup>C spectrum of SA-6.

2MB1+4Fea #13 RT: 0.18 AV: 1 NL: 2.76E3  
T: ITMS + c ESI Full ms [50.00-1500.00]

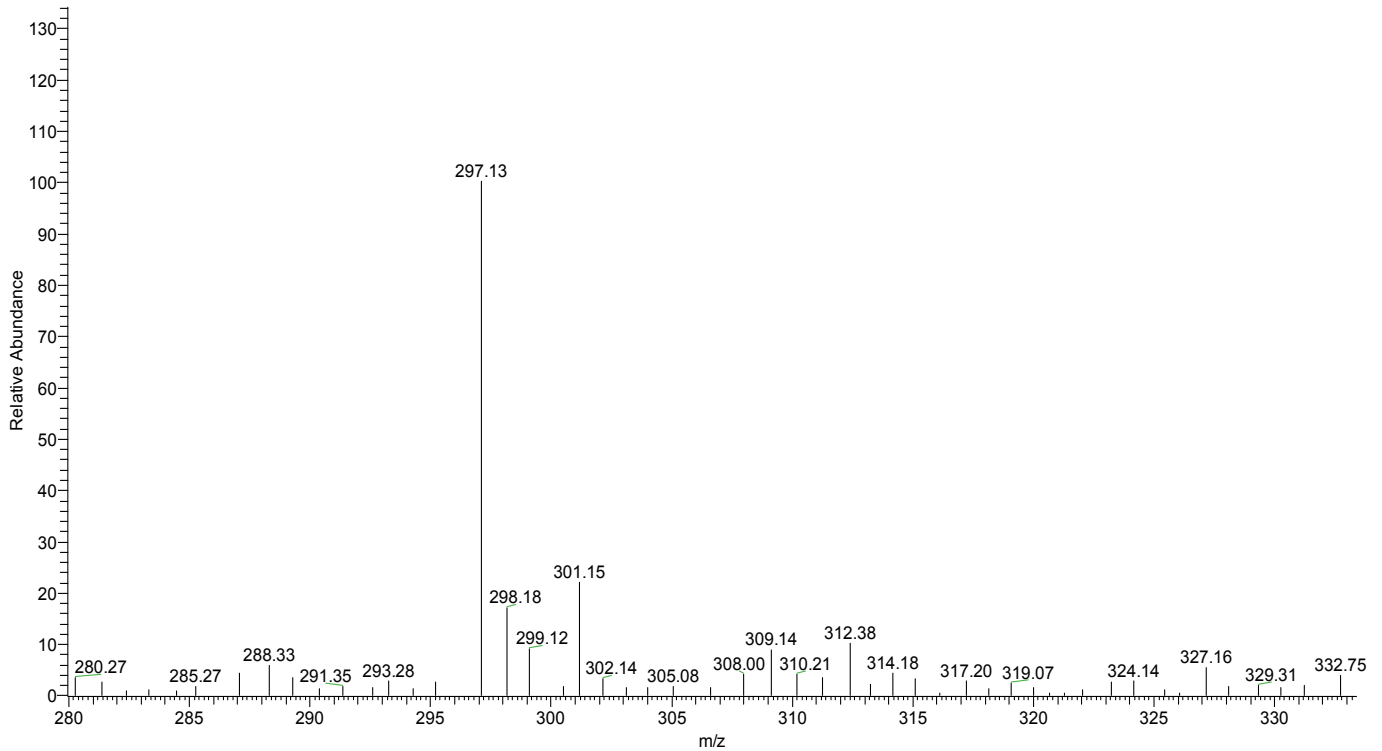

Figure S18.ESI-MASS Spectrum of SA-6.

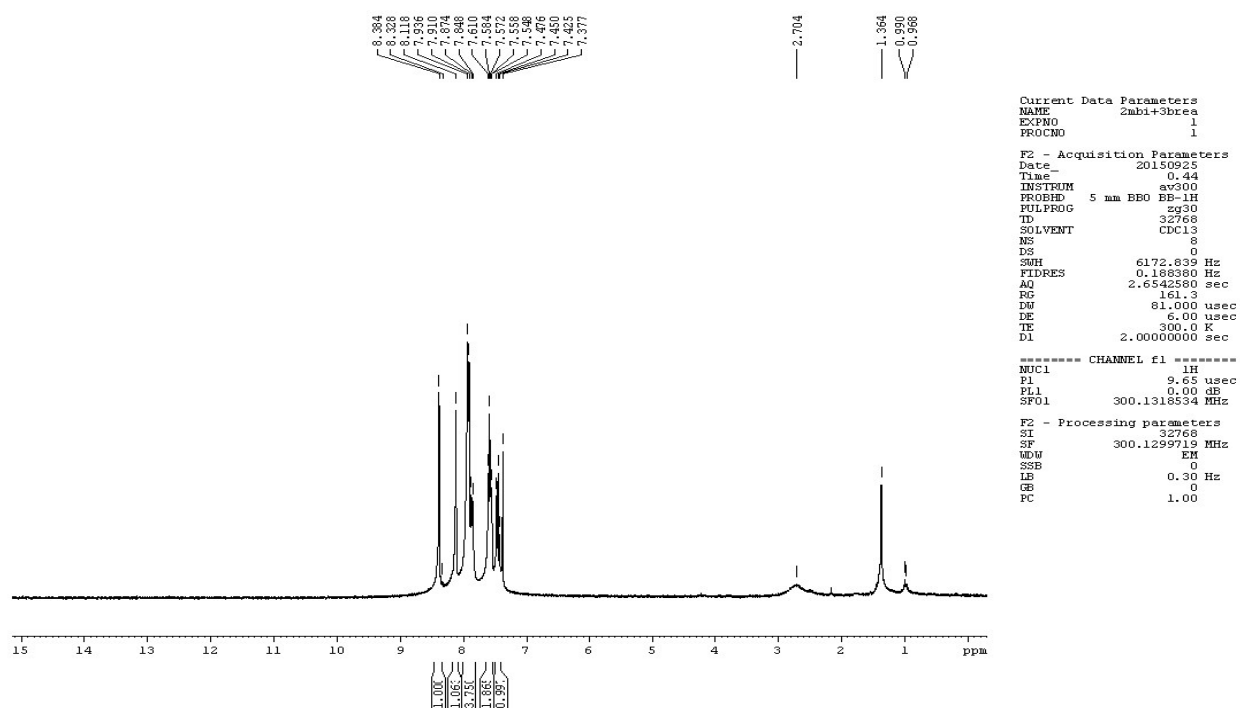

Figure S19. <sup>1</sup>H spectrum of SA-7.

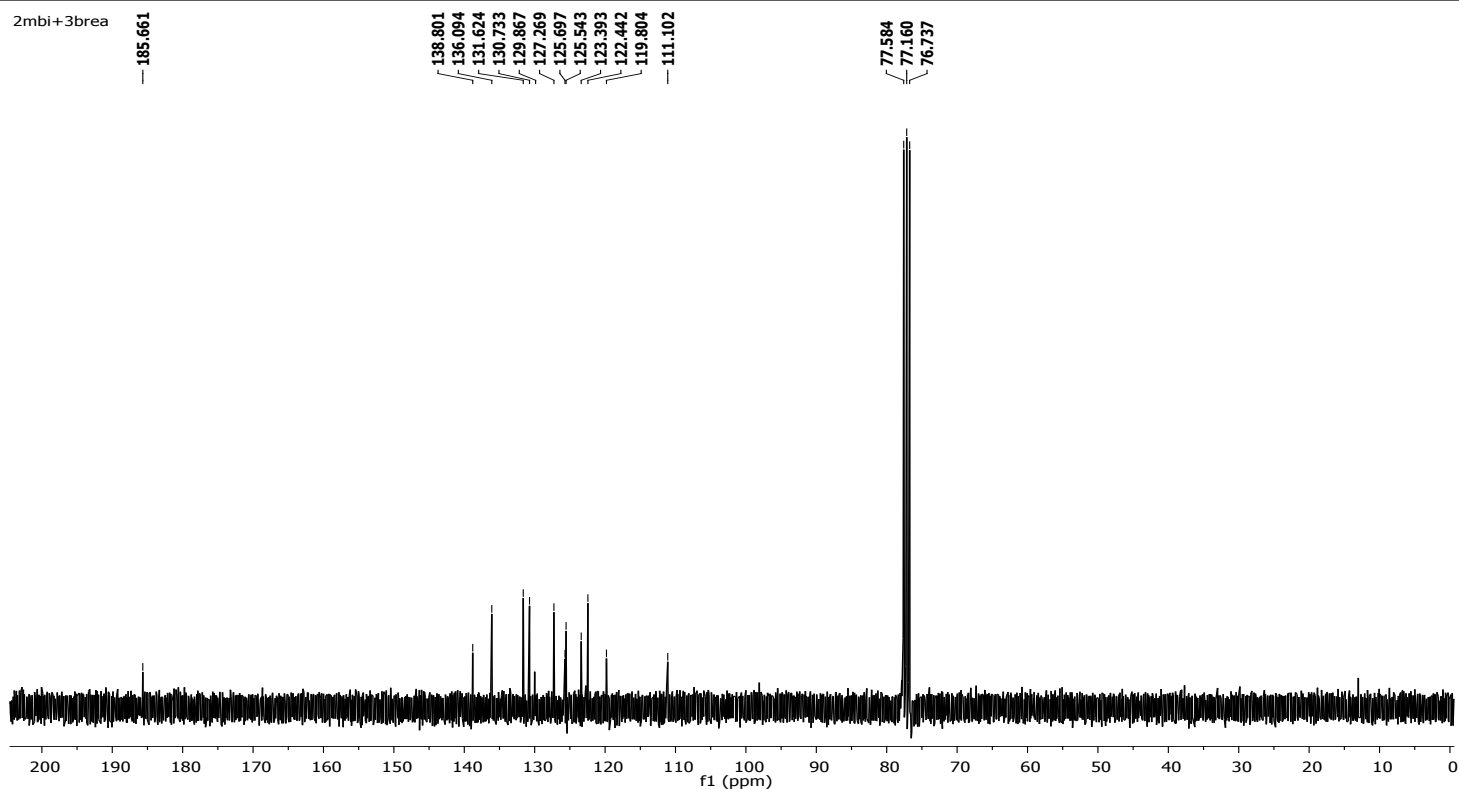

Figure S20. <sup>13</sup>C spectrum of SA-7.

2MB1+3Biea #11 RT: 0.16 AV: 1 NL: 6.55E2  
 T: ITMS + cESI Full ms [50.00-1500.00]

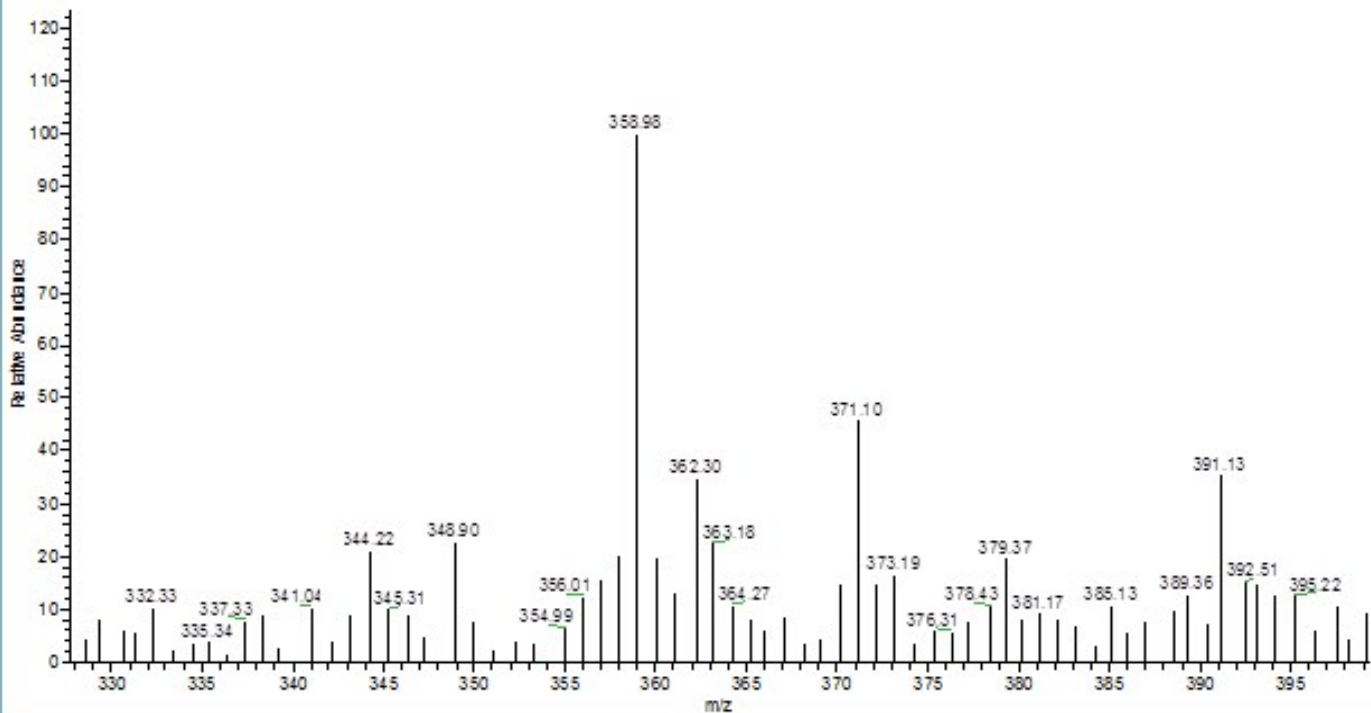

Figure S21.ESI-MASS Spectrum of SA-7.

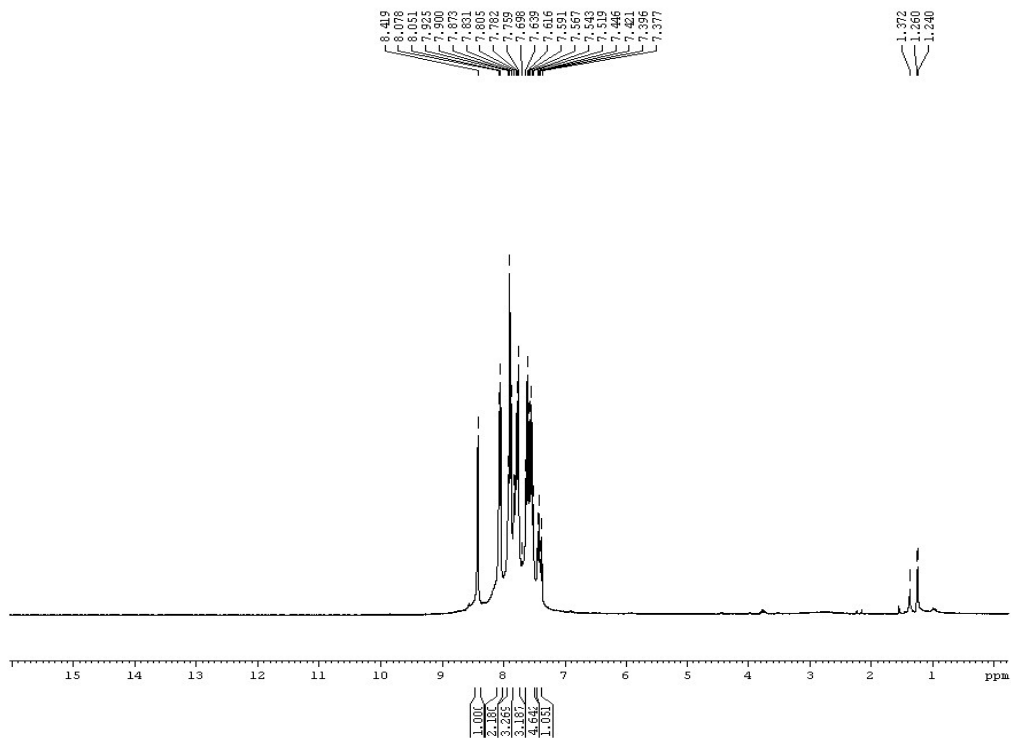

Figure S22. <sup>1</sup>H spectrum of SA-8.

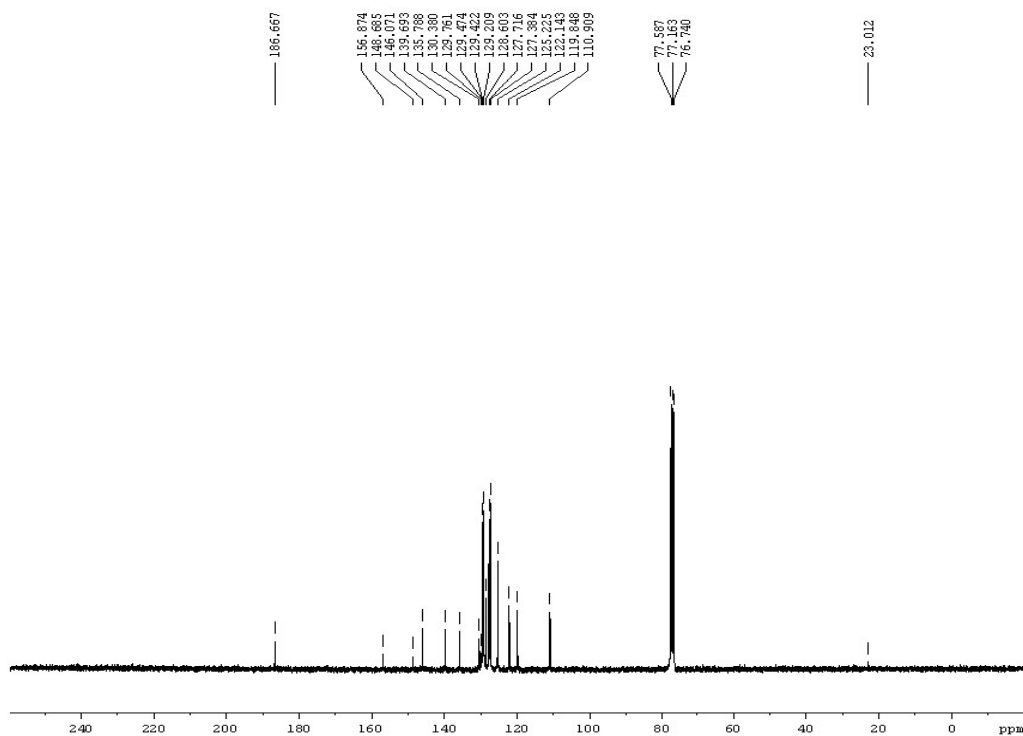

```

Current Data Parameters
NAME      2mbi+4piphea
EXPNO    2
PROCNO   2

F2 - Acquisition Parameters
Date_    20150925
Time     7.57
INSTRUM  av300
PROBHD   5 mm BBO BB-1H
PULPROG  zgpg30
TD        65536
SOLVENT  CDCl3
NS        2510
DS        4
SWH       21097.047 Hz
FIDRES    0.321915 Hz
AQ        1.5532532 sec
RG        16384
DW        23.700 usec
DE        6.00 usec
TE        300.0 K
D1        2.00000000 sec
d11       0.03000000 sec
d12       0.00002000 sec

===== CHANNEL f1 =====
NUC1      13C
P1        12.50 usec
PL1       -5.00 dB
SFO1      75.4767751 MHz

===== CHANNEL f2 =====
CQDPRG2   waltz16
NUC2      1H
PCPD2     100.00 usec
PL2       0.00 dB
PL12      20.31 dB
PL13      10.00 dB
SFO2      300.1312005 MHz

F2 - Processing parameters
SI        32768
SF        75.4677387 MHz
WDW       EM
SSB       0
LB        1.00 Hz
GB        0
PC        1.40

```

Figure S23. <sup>13</sup>C spectrum of SA-8.

117 #22 RT: 028 AV: 1 NL: 1.18E4  
T: (TMS - c ESI)Full.ms(50.00-1000.00)

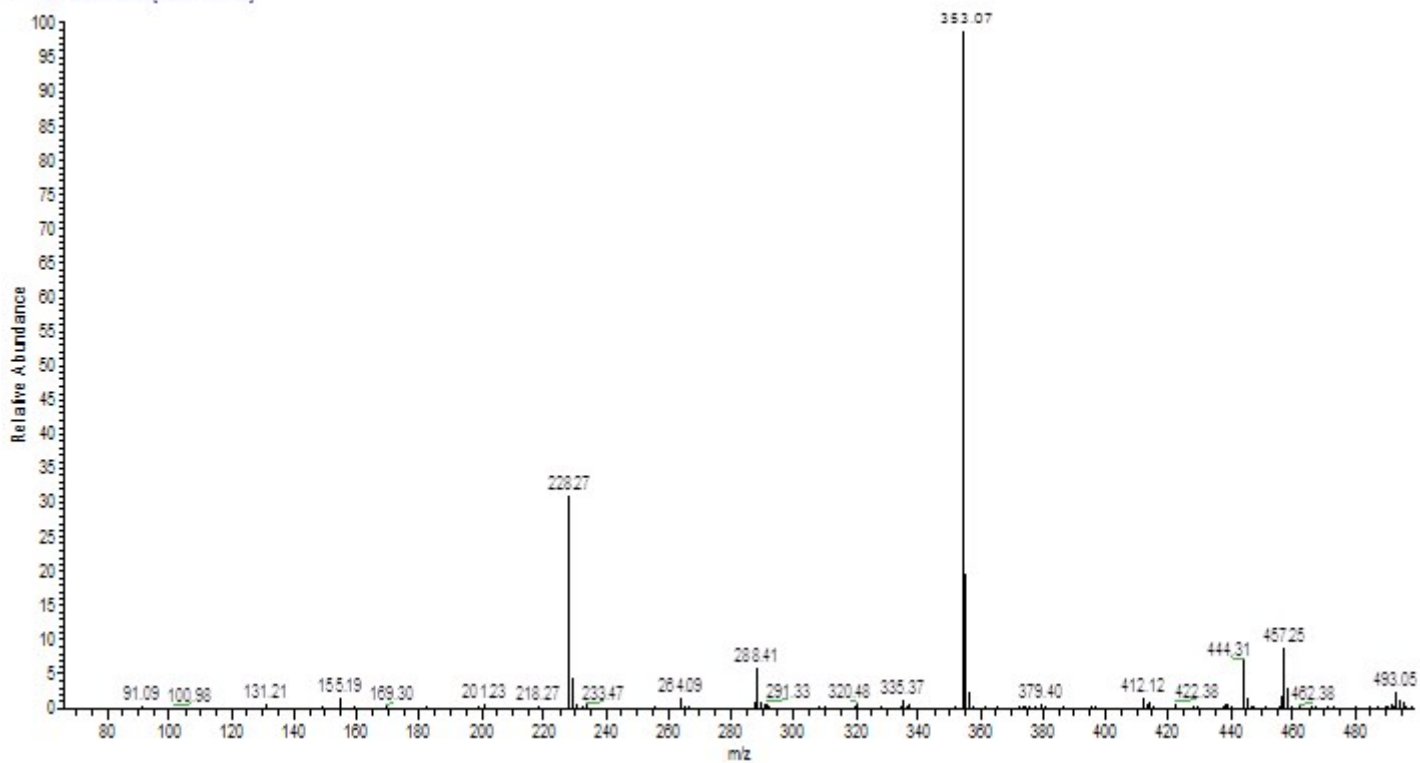

Figure S24. ESI-MASS Spectrum of SA-8.

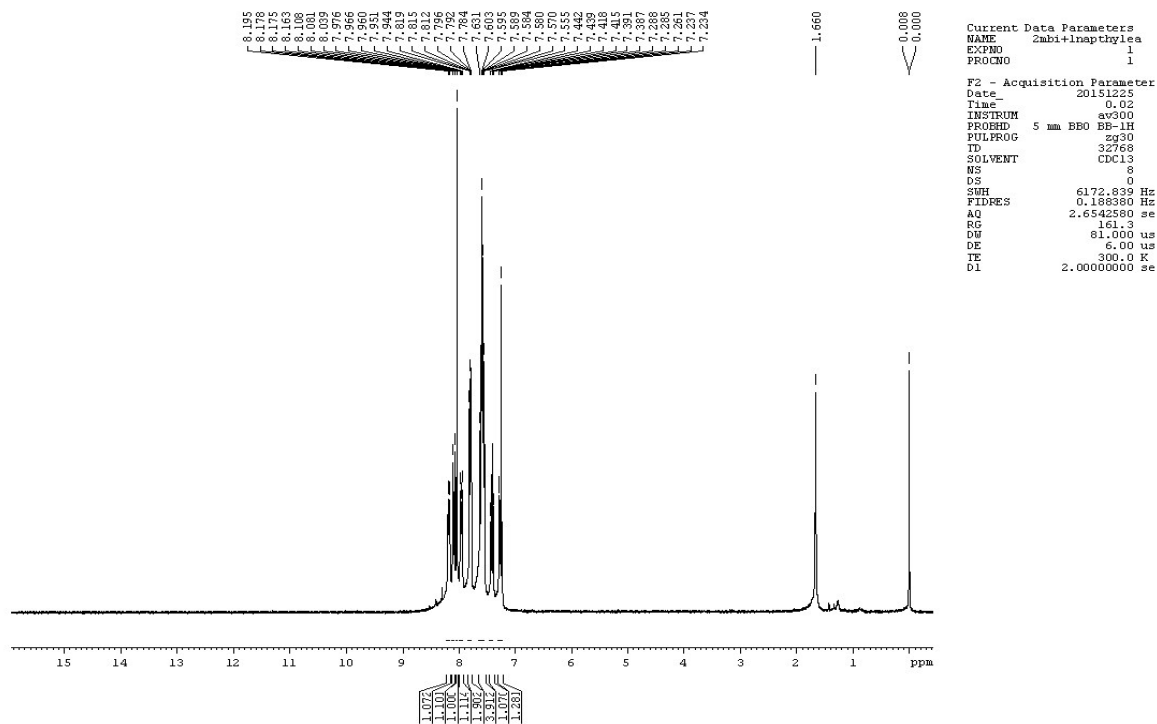

Figure S25. <sup>1</sup>H spectrum of SA-9.

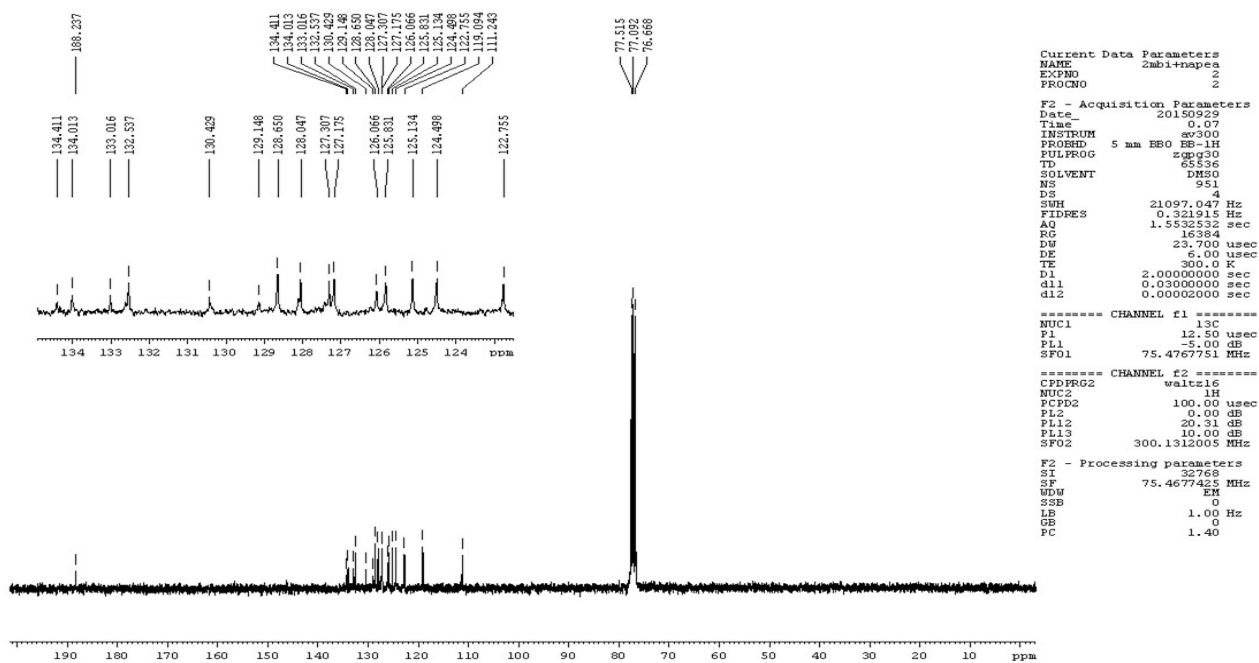

Figure S26. <sup>13</sup>C spectrum of SA-9.



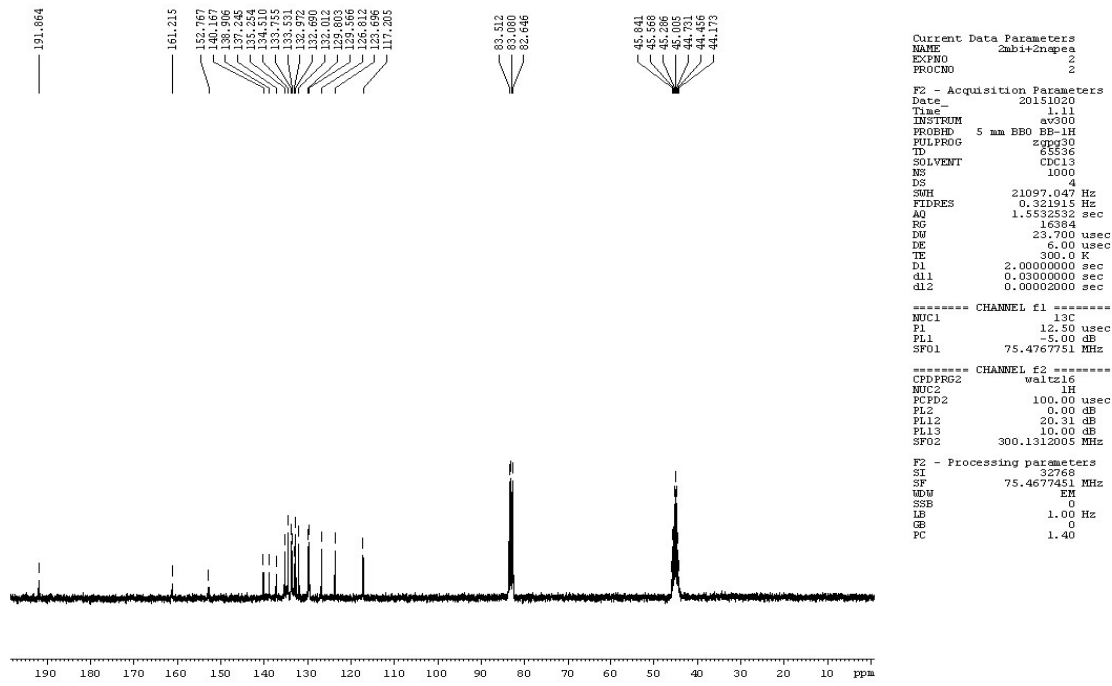

Figure S29. <sup>13</sup>C spectrum of SA-10.

2MB1+2Napea #11 RT: 0.16 AV: 1 NL: 1.99E3  
 T: ITMS + c ESI Full ms [50.00-1500.00]

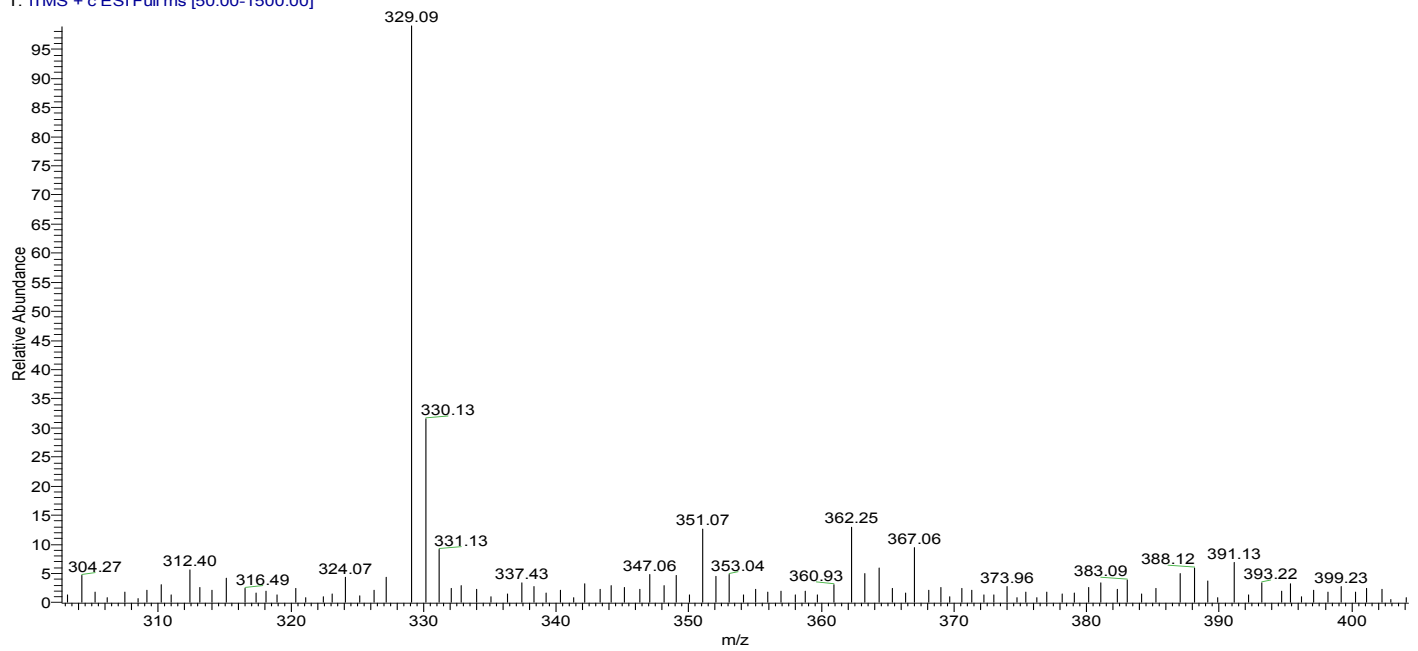

Figure S30. ESI-MASS Spectrum of SA-10.



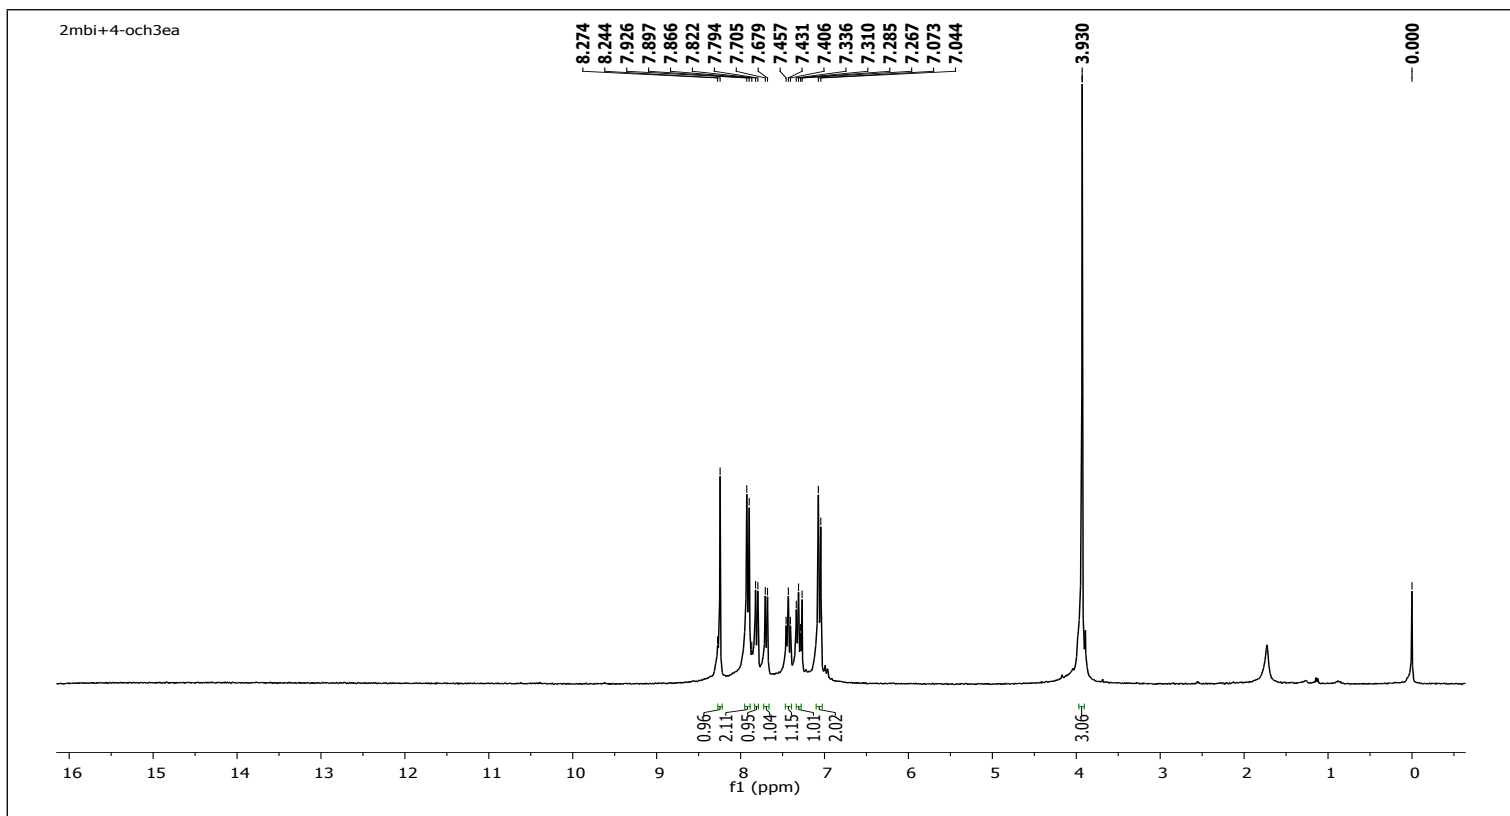

Figure S31.  $^1\text{H}$  spectrum of SA-11.

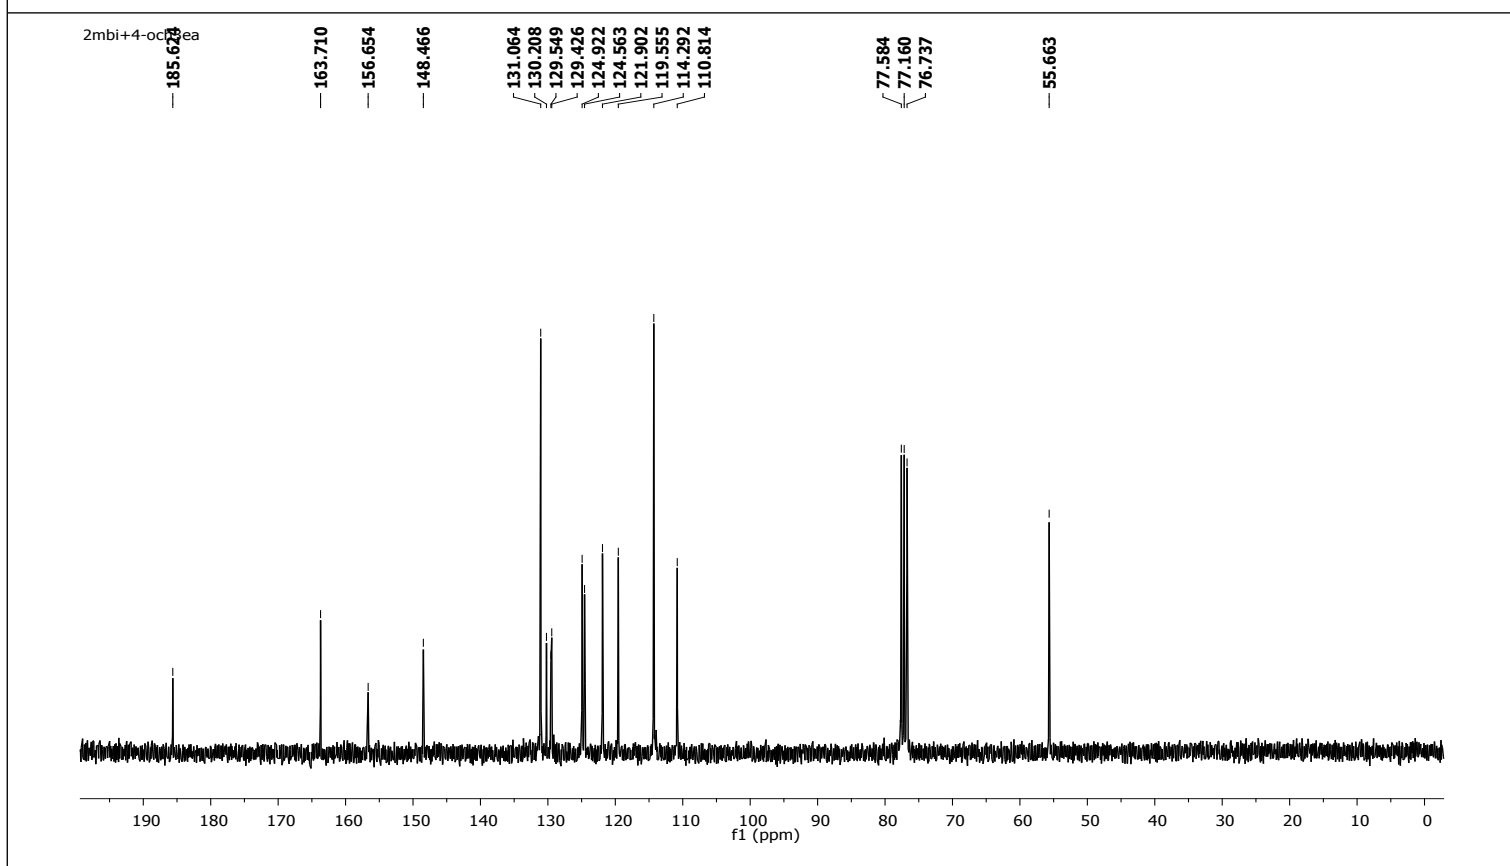

Figure S32.  $^{13}\text{C}$  spectrum of SA-11.

2MB1+4OMeea #13 RT: 0.19 AV: 1 NL: 2.76E3  
T: ITMS + c ESI Full ms [50.00-1500.00]

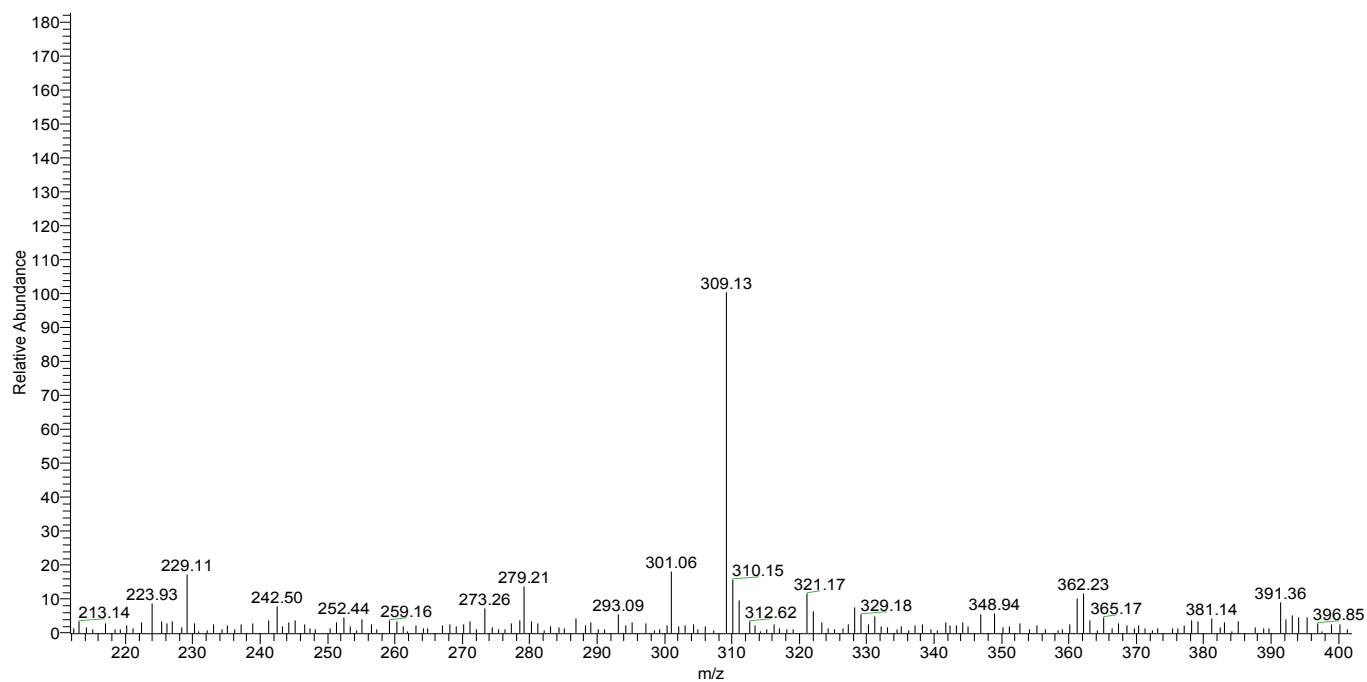

Figure S33.ESI-MASS Spectrum of SA-11.

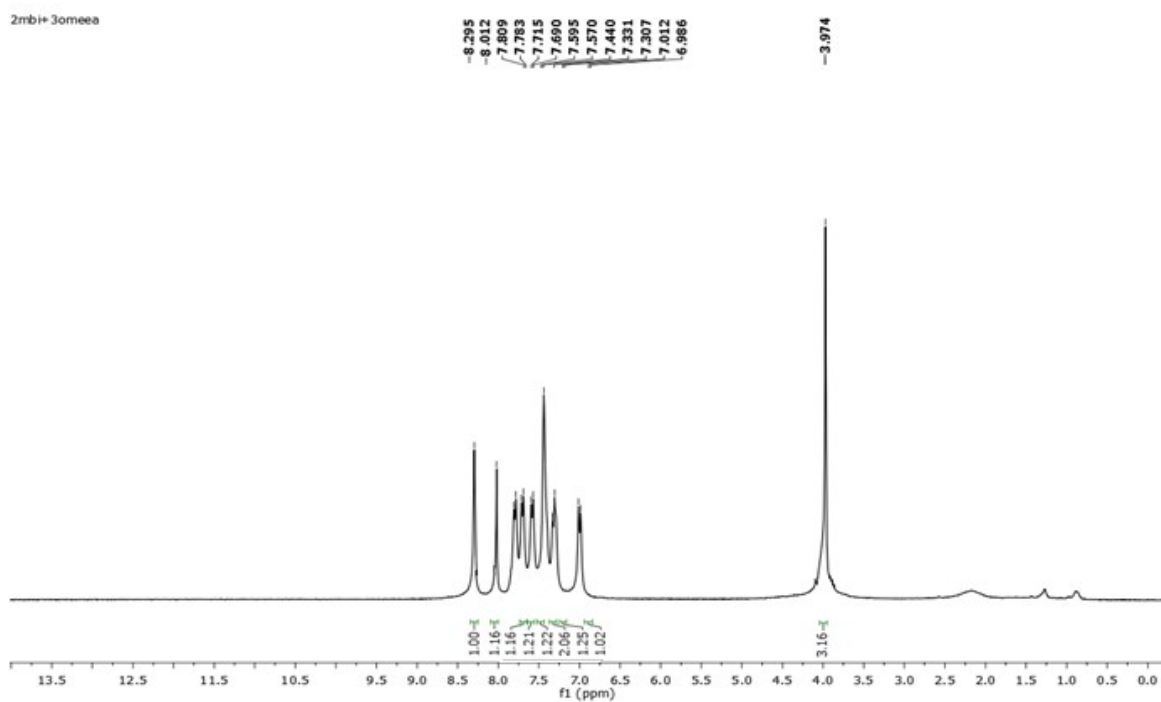

Figure S34.<sup>1</sup>H spectrum of SA-12.

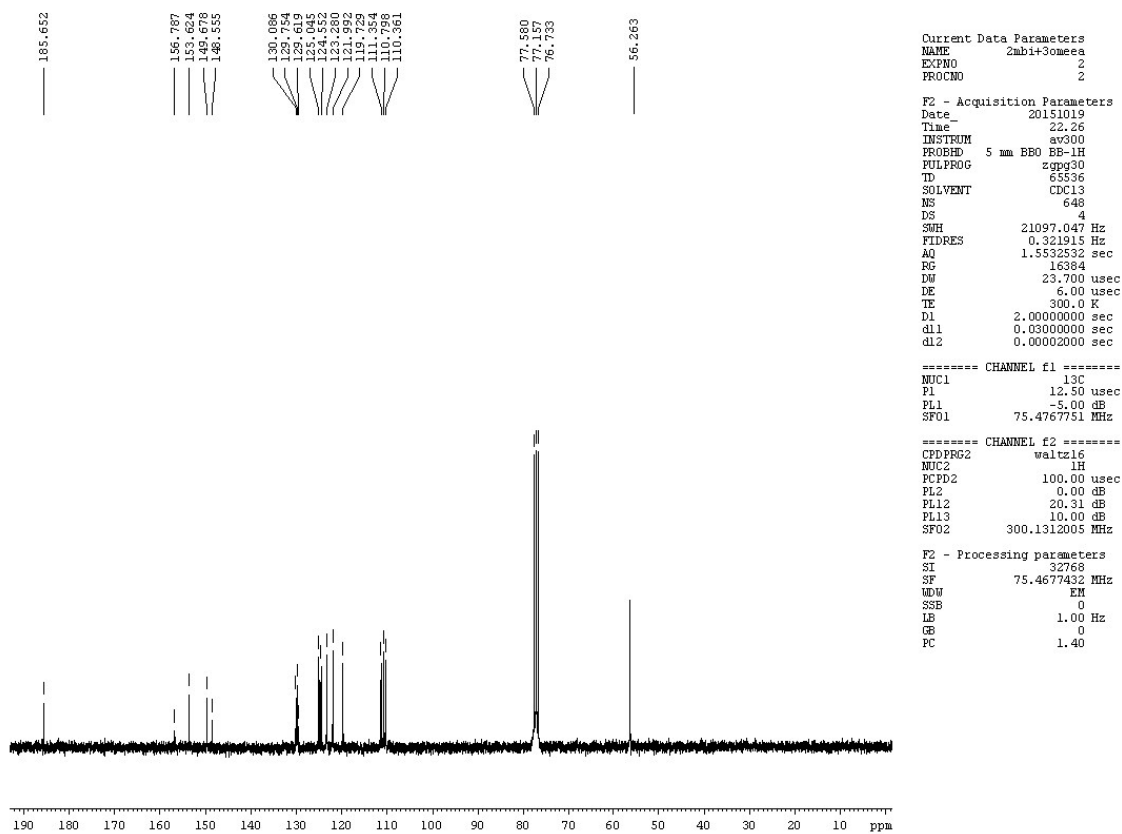

Figure S35. <sup>13</sup>C spectrum of SA-12.

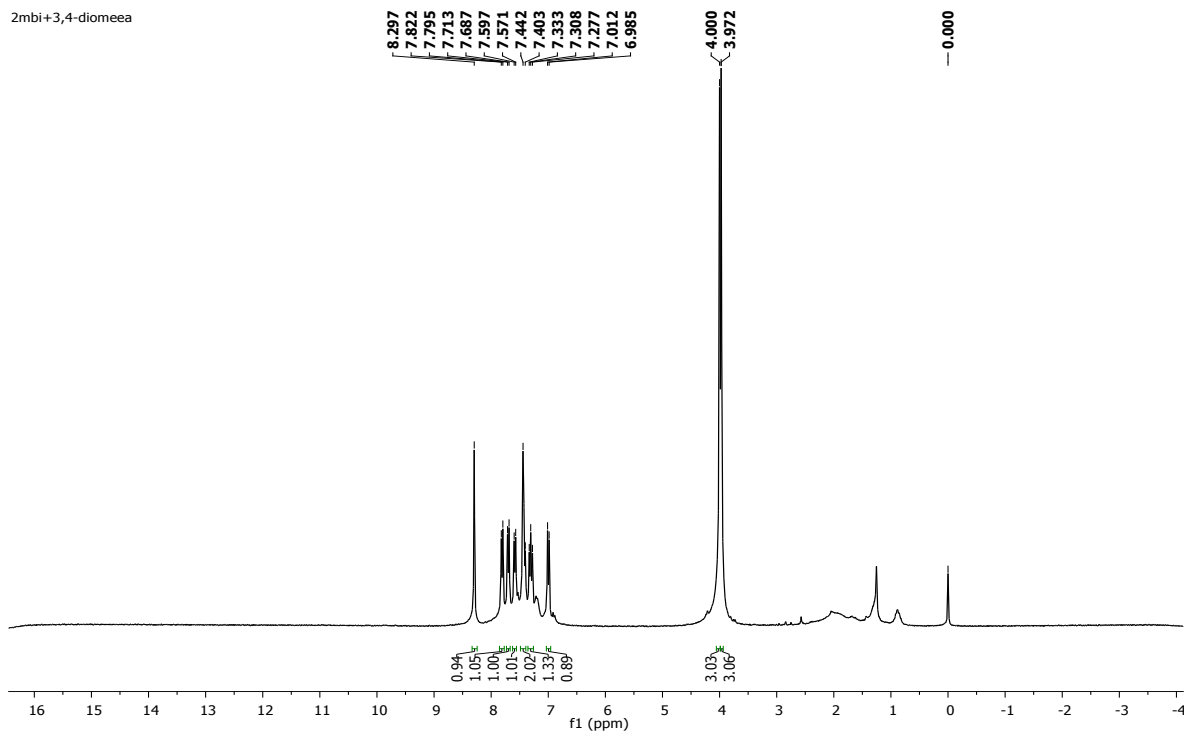

Figure S36. <sup>1</sup>H spectrum of SA-13.

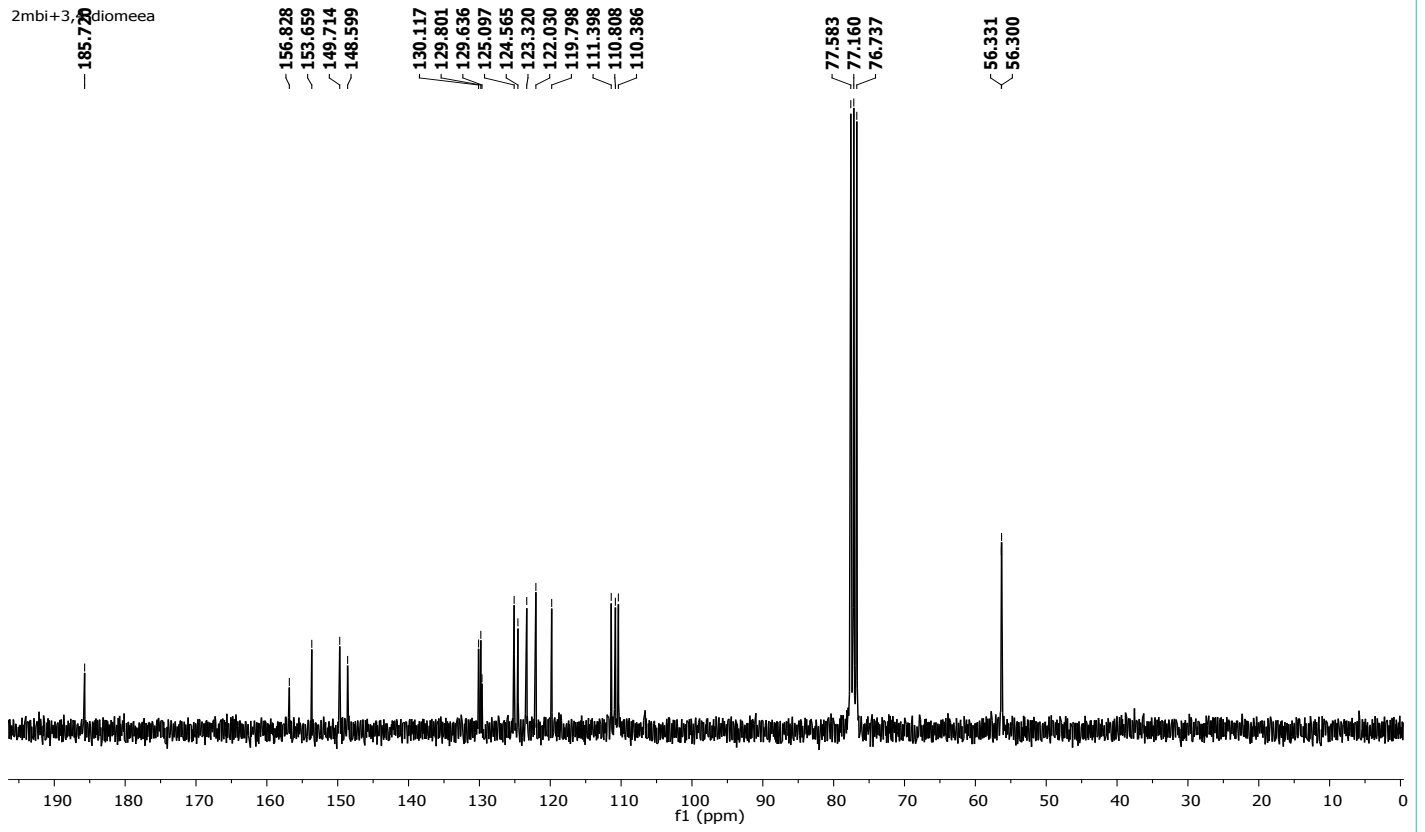

Figure S37.  $^{13}\text{C}$  spectrum of SA-13.

110 #17 RT: 0.22 AV: 1 NL: 3.86E4  
 T: ITMS + c ESI Full ms [50.00-1000.00]

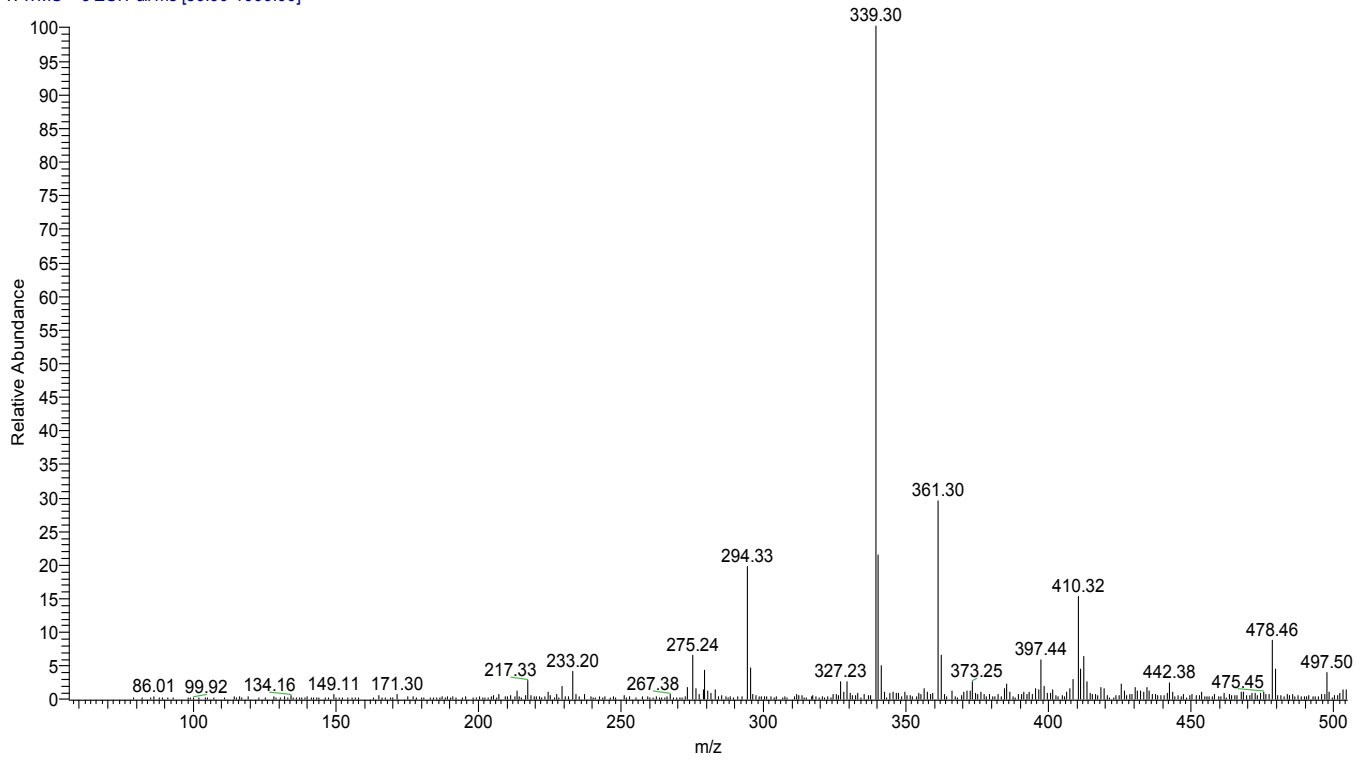

Figure S38. ESI-MASS Spectrum of SA-13.

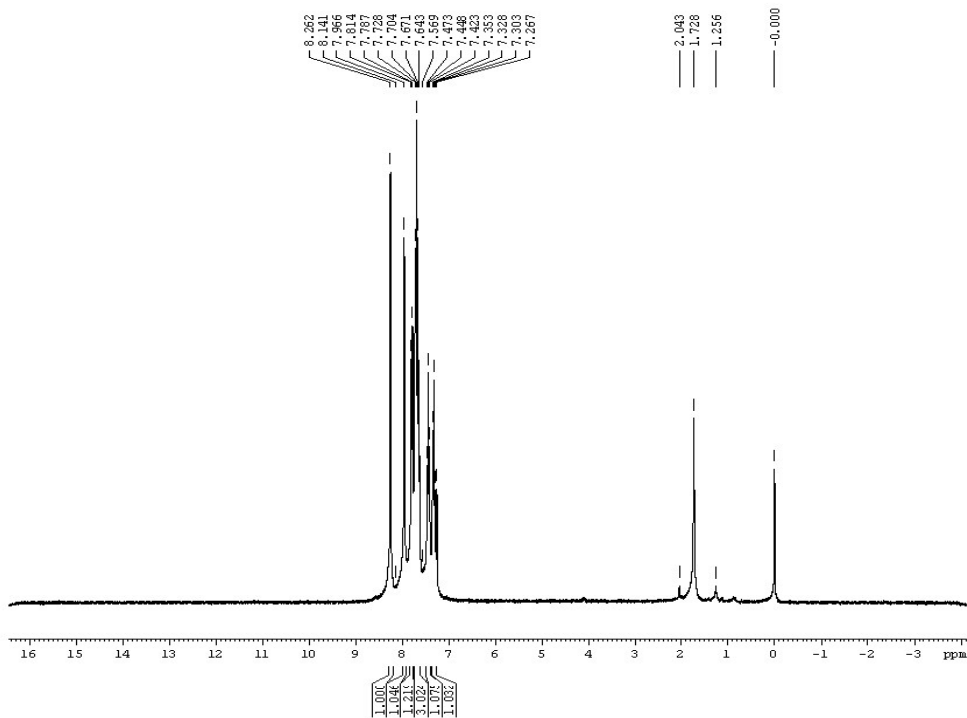

```

Current Data Parameters
NAME      2mbi+3,4diclearpt
EXPNO    1
PROCNO   1

F2 - Acquisition Parameters
Date_    20151107
Time     0.10
INSTRUM  av300
PROBHD   5 mm EBO BB-1H
PULPROG  zg30
TD       32768
SOLVENT  CDC13
NS       8
DS       0
SMH      6172.839 Hz
FIDRES   0.188380 Hz
AQ       2.6542580 sec
RG       161.3
DW       81.000 usec
DE       6.00 usec
TE       300.0 K
D1       2.00000000 sec

----- CHANNEL f1 -----
NUC1     1H
P1       9.65 usec
PL1      0.00 dB
SF01     300.1318534 MHz

F2 - Processing parameters
SI       32768
SF       300.1300060 MHz
WDW      EM
SSB      0
LB       0.30 Hz
GB       0
PC       1.00

```

Figure S39. <sup>1</sup>H spectrum of SA-14.

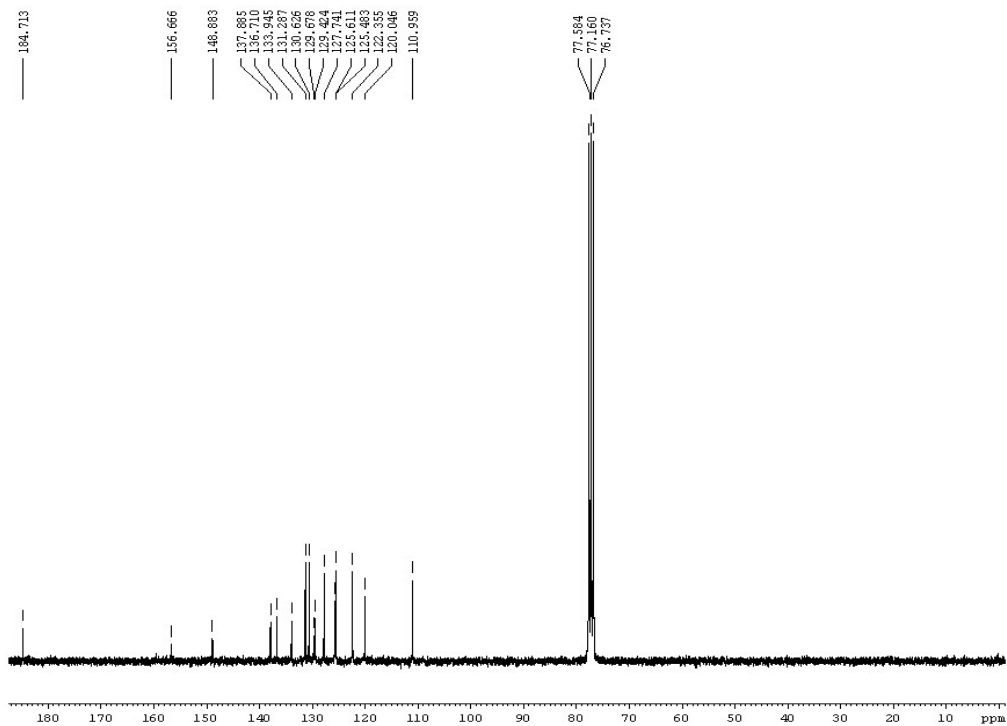

```

Current Data Parameters
NAME      2mbi+3,4diclearpt
EXPNO    2
PROCNO   1

F2 - Acquisition Parameters
Date_    20151107
Time     0.57
INSTRUM  av300
PROBHD   5 mm EBO BB-1H
PULPROG  zgpg30
TD       65536
SOLVENT  CDC13
NS       3000
DS       4
SMH      17985.611 Hz
FIDRES   0.274439 Hz
AQ       1.8219508 sec
RG       32768
DW       27.800 usec
DE       6.00 usec
TE       300.0 K
D1       2.00000000 sec
d11      0.03000000 sec
d12      0.00002000 sec

----- CHANNEL f1 -----
NUC1     13C
P1       12.50 usec
PL1      -5.00 dB
SF01     75.4752653 MHz

----- CHANNEL f2 -----
CPDPRG2  waltz16
NUC2     1H
PCPD2    100.00 usec
PL2      0.00 dB
PL12     20.31 dB
PL13     10.00 dB
SF02     300.1312005 MHz

```

Figure S40. <sup>13</sup>C spectrum of SA-14.

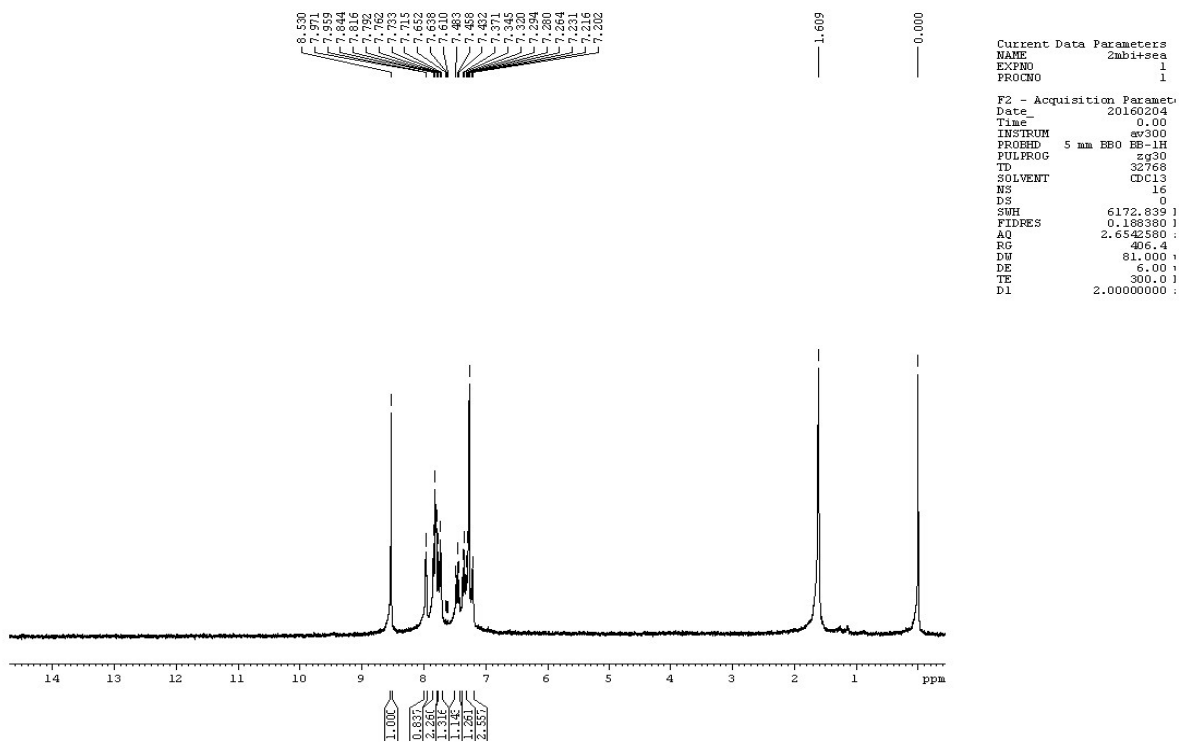

Figure S41.  $^1\text{H}$  spectrum of SA-15.

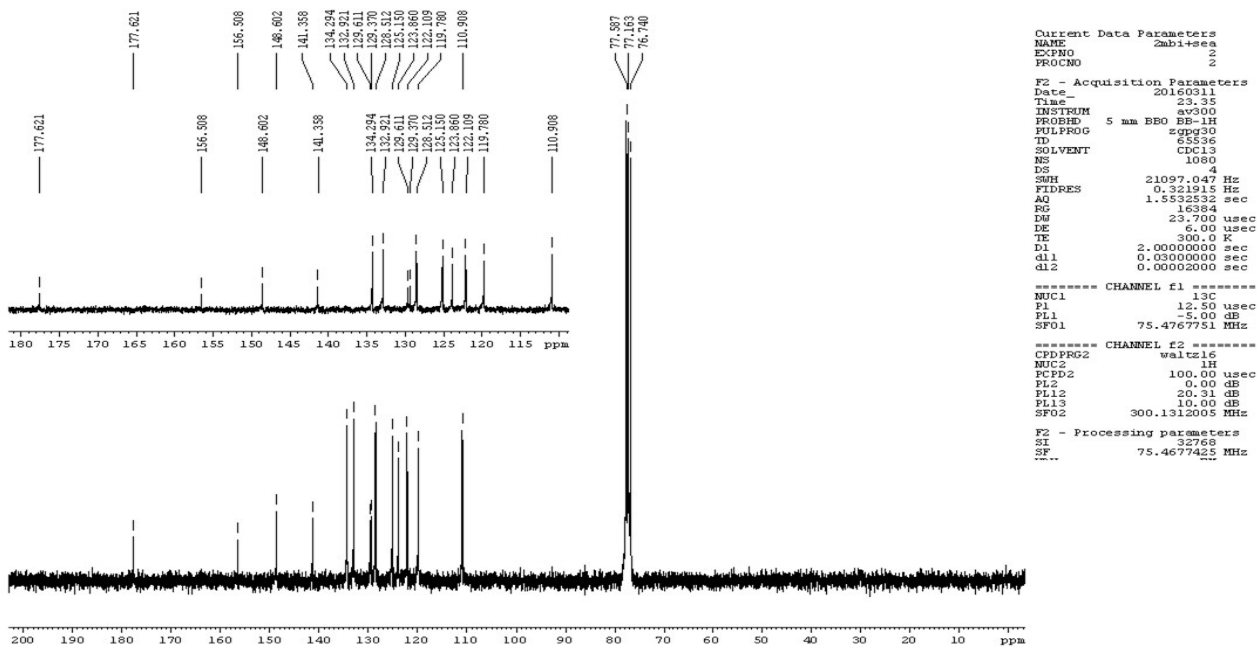

Figure S42.  $^{13}\text{C}$  spectrum of SA-15.

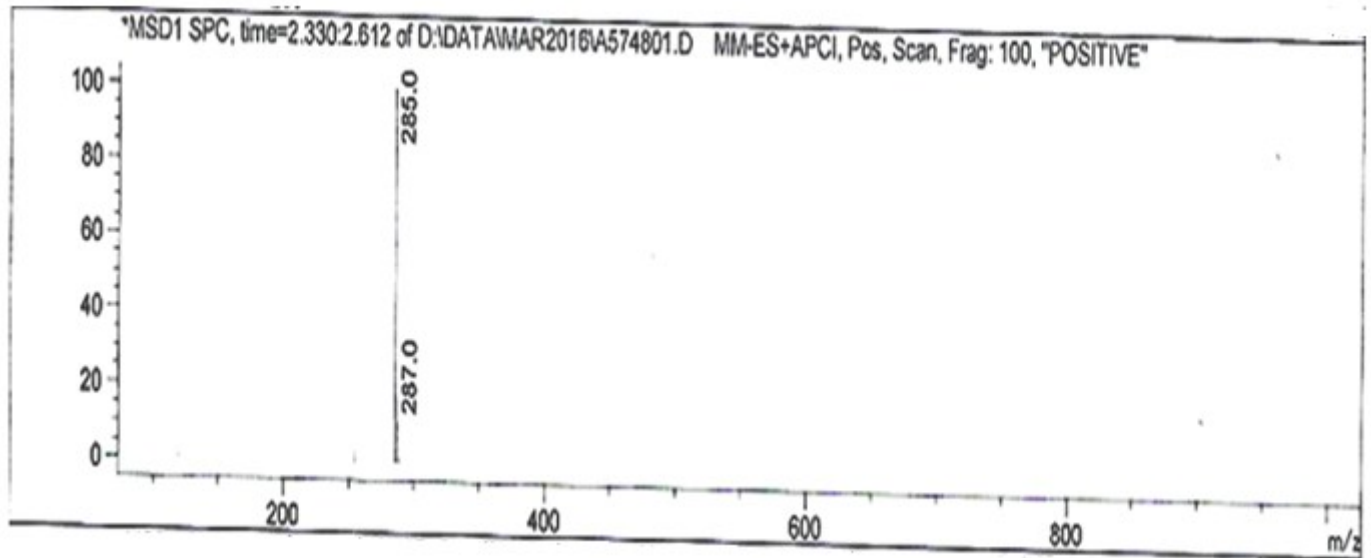

Figure S43.ESI-MASS Spectrum of SA-15.

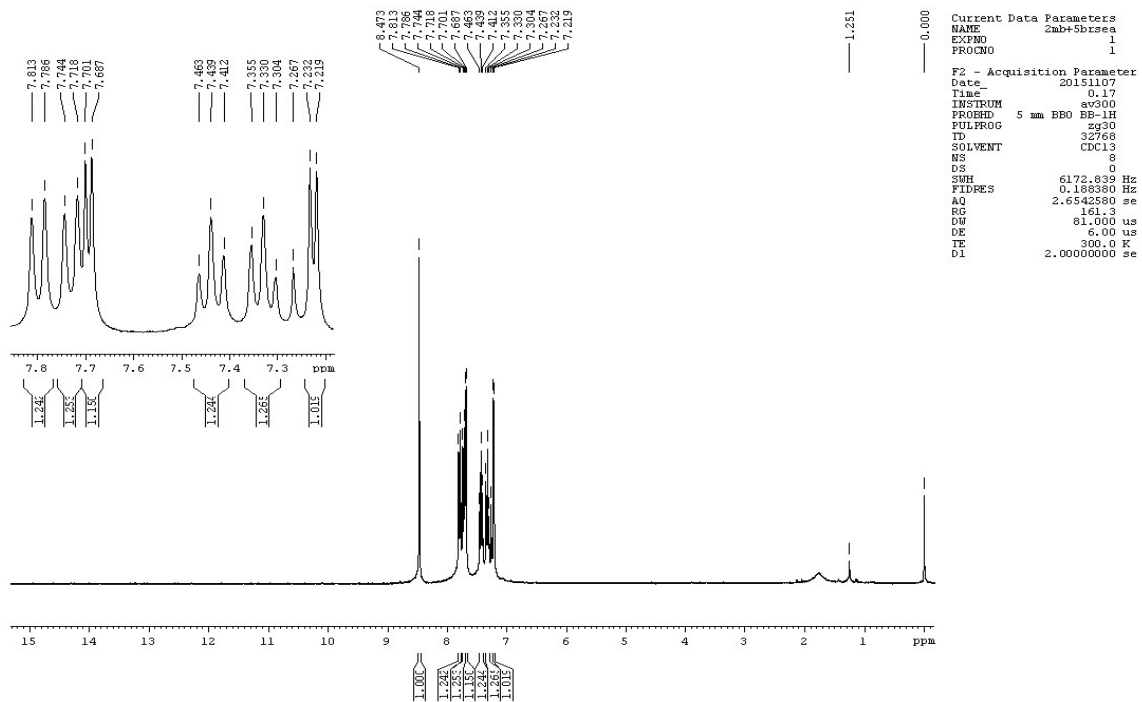

Figure S44. <sup>1</sup>H spectrum of SA-16.

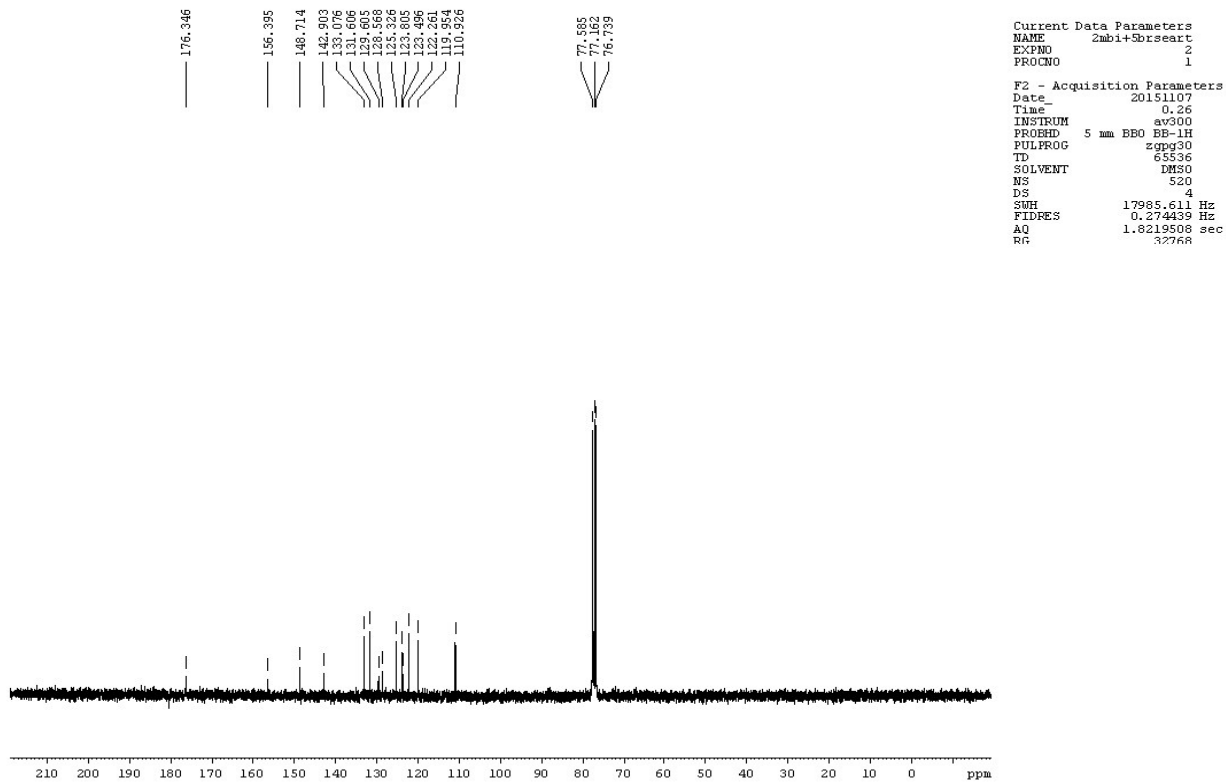

Figure S45. <sup>13</sup>C spectrum of SA-16.

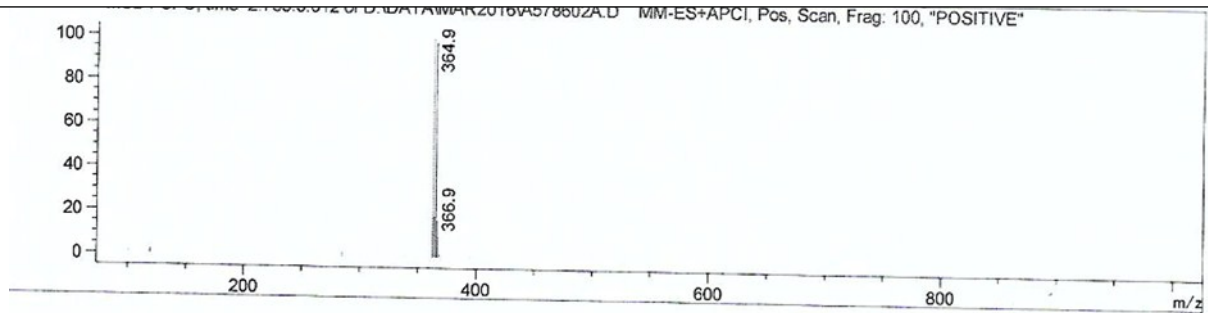

Figure S46. ESI-MASS Spectrum of SA-16.



#### 4. Crystal Data:

##### 1. Compound SA-2

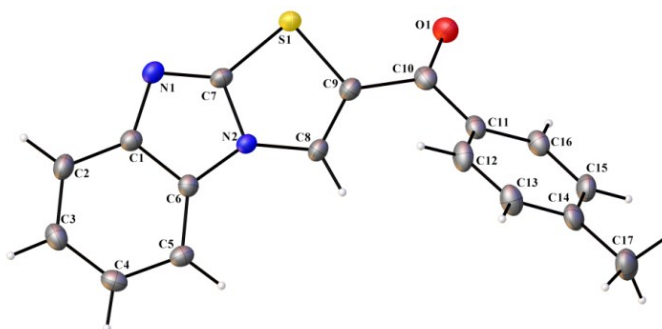

Figure.S47 ORTEP diagram of SA-2.

**Table S1. Crystal data and structure refinement for PTB\_151206\_A1\_MB1plus.**

|                                 |                                                    |                  |
|---------------------------------|----------------------------------------------------|------------------|
| Identification code             | mb1plus                                            |                  |
| Empirical formula               | C <sub>17</sub> H <sub>12</sub> N <sub>2</sub> O S |                  |
| Formula weight                  | 292.35                                             |                  |
| Temperature                     | 110.15 K                                           |                  |
| Wavelength                      | 0.71073 Å                                          |                  |
| Crystal system                  | Monoclinic                                         |                  |
| Space group                     | P 1 21/n 1                                         |                  |
| Unit cell dimensions            | a = 9.940(3) Å                                     | α = 90°.         |
|                                 | b = 12.584(4) Å                                    | β = 112.959(3)°. |
|                                 | c = 11.973(4) Å                                    | γ = 90°.         |
| Volume                          | 1379.0(7) Å <sup>3</sup>                           |                  |
| Z                               | 4                                                  |                  |
| Density (calculated)            | 1.408 Mg/m <sup>3</sup>                            |                  |
| Absorption coefficient          | 0.234 mm <sup>-1</sup>                             |                  |
| F(000)                          | 608                                                |                  |
| Crystal size                    | 0.54 x 0.52 x 0.51 mm <sup>3</sup>                 |                  |
| Theta range for data collection | 2.271 to 27.585°.                                  |                  |
| Index ranges                    | -12 ≤ h ≤ 12, -16 ≤ k ≤ 16, -15 ≤ l ≤ 15           |                  |
| Reflections collected           | 15518                                              |                  |
| Independent reflections         | 3174 [R(int) = 0.0560]                             |                  |
| Completeness to theta = 25.242° | 99.8 %                                             |                  |
| Absorption correction           | Semi-empirical from equivalents                    |                  |
| Max. and min. transmission      | 0.7456 and 0.5972                                  |                  |

|                                   |                                             |
|-----------------------------------|---------------------------------------------|
| Refinement method                 | Full-matrix least-squares on F <sup>2</sup> |
| Data / restraints / parameters    | 3174 / 0 / 192                              |
| Goodness-of-fit on F <sup>2</sup> | 1.036                                       |
| Final R indices [I>2sigma(I)]     | R1 = 0.0389, wR2 = 0.0837                   |
| R indices (all data)              | R1 = 0.0524, wR2 = 0.0905                   |
| Extinction coefficient            | 0.0276(19)                                  |
| Largest diff. peak and hole       | 0.406 and -0.300 e.Å <sup>-3</sup>          |

**Table S2. Atomic coordinates (  $\times 10^4$ ) and equivalent isotropic displacement parameters ( $\text{\AA}^2 \times 10^3$ ) for PTB\_151206\_A1\_MB1plus. U(eq) is defined as one third of the trace of the orthogonalized  $U^{ij}$  tensor.**

|       | x        | y       | z       | U(eq) |
|-------|----------|---------|---------|-------|
| S(1)  | 6291(1)  | 3722(1) | 8437(1) | 22(1) |
| O(1)  | 3001(1)  | 3985(1) | 7536(1) | 31(1) |
| N(1)  | 8923(2)  | 2833(1) | 8517(1) | 21(1) |
| N(2)  | 6872(1)  | 2747(1) | 6799(1) | 18(1) |
| C(1)  | 9194(2)  | 2288(1) | 7603(1) | 19(1) |
| C(2)  | 10481(2) | 1816(1) | 7644(2) | 24(1) |
| C(3)  | 10456(2) | 1320(1) | 6605(2) | 25(1) |
| C(4)  | 9191(2)  | 1277(1) | 5542(2) | 22(1) |
| C(5)  | 7895(2)  | 1724(1) | 5482(1) | 20(1) |
| C(6)  | 7939(2)  | 2228(1) | 6526(1) | 17(1) |
| C(7)  | 7534(2)  | 3071(1) | 7992(1) | 18(1) |
| C(8)  | 5426(2)  | 3020(1) | 6221(1) | 18(1) |
| C(9)  | 4929(2)  | 3551(1) | 6965(1) | 20(1) |
| C(10) | 3410(2)  | 3865(1) | 6701(2) | 22(1) |
| C(11) | 2403(2)  | 4012(1) | 5411(2) | 20(1) |
| C(12) | 2877(2)  | 4418(1) | 4547(2) | 25(1) |
| C(13) | 1908(2)  | 4575(1) | 3364(2) | 26(1) |
| C(14) | 437(2)   | 4323(1) | 2998(2) | 24(1) |
| C(15) | -33(2)   | 3914(1) | 3867(2) | 25(1) |
| C(16) | 923(2)   | 3770(1) | 5056(2) | 22(1) |
| C(17) | -614(2)  | 4507(2) | 1707(2) | 33(1) |

**Table S3. Bond lengths [Å] and angles [°] for PTB\_151206\_A1\_MB1plus.**

---

|              |            |
|--------------|------------|
| S(1)-C(7)    | 1.7306(17) |
| S(1)-C(9)    | 1.7675(17) |
| O(1)-C(10)   | 1.226(2)   |
| N(1)-C(1)    | 1.404(2)   |
| N(1)-C(7)    | 1.309(2)   |
| N(2)-C(6)    | 1.389(2)   |
| N(2)-C(7)    | 1.381(2)   |
| N(2)-C(8)    | 1.373(2)   |
| C(1)-C(2)    | 1.394(2)   |
| C(1)-C(6)    | 1.403(2)   |
| C(2)-H(2)    | 0.9500     |
| C(2)-C(3)    | 1.383(2)   |
| C(3)-H(3)    | 0.9500     |
| C(3)-C(4)    | 1.398(2)   |
| C(4)-H(4)    | 0.9500     |
| C(4)-C(5)    | 1.382(2)   |
| C(5)-H(5)    | 0.9500     |
| C(5)-C(6)    | 1.387(2)   |
| C(8)-H(8)    | 0.9500     |
| C(8)-C(9)    | 1.351(2)   |
| C(9)-C(10)   | 1.471(2)   |
| C(10)-C(11)  | 1.488(2)   |
| C(11)-C(12)  | 1.391(2)   |
| C(11)-C(16)  | 1.397(2)   |
| C(12)-H(12)  | 0.9500     |
| C(12)-C(13)  | 1.381(2)   |
| C(13)-H(13)  | 0.9500     |
| C(13)-C(14)  | 1.390(2)   |
| C(14)-C(15)  | 1.395(2)   |
| C(14)-C(17)  | 1.508(2)   |
| C(15)-H(15)  | 0.9500     |
| C(15)-C(16)  | 1.380(2)   |
| C(16)-H(16)  | 0.9500     |
| C(17)-H(17A) | 0.9800     |
| C(17)-H(17B) | 0.9800     |
| C(17)-H(17C) | 0.9800     |

|                   |            |
|-------------------|------------|
| C(7)-S(1)-C(9)    | 89.80(8)   |
| C(7)-N(1)-C(1)    | 103.02(13) |
| C(7)-N(2)-C(6)    | 106.40(13) |
| C(8)-N(2)-C(6)    | 138.13(14) |
| C(8)-N(2)-C(7)    | 115.47(13) |
| C(2)-C(1)-N(1)    | 129.30(15) |
| C(2)-C(1)-C(6)    | 118.96(15) |
| C(6)-C(1)-N(1)    | 111.73(14) |
| C(1)-C(2)-H(2)    | 121.1      |
| C(3)-C(2)-C(1)    | 117.78(15) |
| C(3)-C(2)-H(2)    | 121.1      |
| C(2)-C(3)-H(3)    | 119.0      |
| C(2)-C(3)-C(4)    | 122.07(16) |
| C(4)-C(3)-H(3)    | 119.0      |
| C(3)-C(4)-H(4)    | 119.3      |
| C(5)-C(4)-C(3)    | 121.36(15) |
| C(5)-C(4)-H(4)    | 119.3      |
| C(4)-C(5)-H(5)    | 122.0      |
| C(4)-C(5)-C(6)    | 115.97(15) |
| C(6)-C(5)-H(5)    | 122.0      |
| N(2)-C(6)-C(1)    | 104.23(13) |
| C(5)-C(6)-N(2)    | 131.91(15) |
| C(5)-C(6)-C(1)    | 123.85(15) |
| N(1)-C(7)-S(1)    | 134.98(13) |
| N(1)-C(7)-N(2)    | 114.62(14) |
| N(2)-C(7)-S(1)    | 110.40(11) |
| N(2)-C(8)-H(8)    | 124.1      |
| C(9)-C(8)-N(2)    | 111.81(14) |
| C(9)-C(8)-H(8)    | 124.1      |
| C(8)-C(9)-S(1)    | 112.51(12) |
| C(8)-C(9)-C(10)   | 126.86(15) |
| C(10)-C(9)-S(1)   | 120.26(12) |
| O(1)-C(10)-C(9)   | 119.80(15) |
| O(1)-C(10)-C(11)  | 121.87(15) |
| C(9)-C(10)-C(11)  | 118.32(14) |
| C(12)-C(11)-C(10) | 122.17(15) |
| C(12)-C(11)-C(16) | 118.37(16) |

|                     |            |
|---------------------|------------|
| C(16)-C(11)-C(10)   | 119.43(15) |
| C(11)-C(12)-H(12)   | 119.6      |
| C(13)-C(12)-C(11)   | 120.88(16) |
| C(13)-C(12)-H(12)   | 119.6      |
| C(12)-C(13)-H(13)   | 119.4      |
| C(12)-C(13)-C(14)   | 121.15(16) |
| C(14)-C(13)-H(13)   | 119.4      |
| C(13)-C(14)-C(15)   | 117.80(16) |
| C(13)-C(14)-C(17)   | 120.76(16) |
| C(15)-C(14)-C(17)   | 121.42(16) |
| C(14)-C(15)-H(15)   | 119.3      |
| C(16)-C(15)-C(14)   | 121.41(16) |
| C(16)-C(15)-H(15)   | 119.3      |
| C(11)-C(16)-H(16)   | 119.8      |
| C(15)-C(16)-C(11)   | 120.37(16) |
| C(15)-C(16)-H(16)   | 119.8      |
| C(14)-C(17)-H(17A)  | 109.5      |
| C(14)-C(17)-H(17B)  | 109.5      |
| C(14)-C(17)-H(17C)  | 109.5      |
| H(17A)-C(17)-H(17B) | 109.5      |
| H(17A)-C(17)-H(17C) | 109.5      |
| H(17B)-C(17)-H(17C) | 109.5      |

---

Symmetry transformations used to generate equivalent atoms:

## 2. Compound SA-6

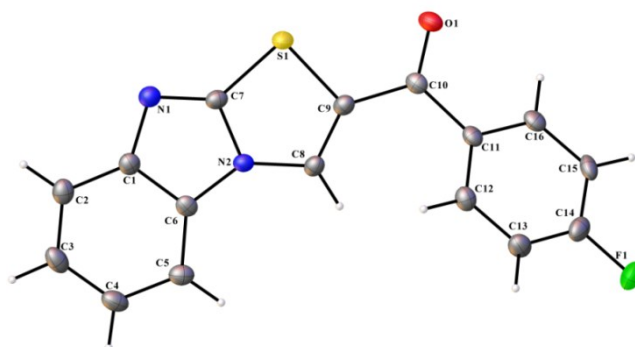

**FigureS48.** ORTEP diagram of SA-6.

**Table S4. Crystal data and structure refinement for PTB\_151206\_A1\_2MB14Fea.**

|                                   |                                                     |          |
|-----------------------------------|-----------------------------------------------------|----------|
| Identification code               | 2mb14fea                                            |          |
| Empirical formula                 | C <sub>16</sub> H <sub>9</sub> F N <sub>2</sub> O S |          |
| Formula weight                    | 296.31                                              |          |
| Temperature                       | 110.15 K                                            |          |
| Wavelength                        | 0.71073 Å                                           |          |
| Crystal system                    | Orthorhombic                                        |          |
| Space group                       | P2 <sub>1</sub> 2 <sub>1</sub> 2 <sub>1</sub>       |          |
| Unit cell dimensions              | a = 6.3722(18) Å                                    | α = 90°. |
|                                   | b = 11.278(3) Å                                     | β = 90°. |
|                                   | c = 17.837(5) Å                                     | γ = 90°. |
| Volume                            | 1281.8(6) Å <sup>3</sup>                            |          |
| Z                                 | 4                                                   |          |
| Density (calculated)              | 1.535 Mg/m <sup>3</sup>                             |          |
| Absorption coefficient            | 0.264 mm <sup>-1</sup>                              |          |
| F(000)                            | 608                                                 |          |
| Crystal size                      | 0.57 x 0.48 x 0.46 mm <sup>3</sup>                  |          |
| Theta range for data collection   | 2.136 to 27.563°.                                   |          |
| Index ranges                      | -8 ≤ h ≤ 8, -14 ≤ k ≤ 14, -23 ≤ l ≤ 23              |          |
| Reflections collected             | 14858                                               |          |
| Independent reflections           | 2957 [R(int) = 0.0463]                              |          |
| Completeness to theta = 25.242°   | 100.0 %                                             |          |
| Absorption correction             | Semi-empirical from equivalents                     |          |
| Max. and min. transmission        | 0.7456 and 0.6640                                   |          |
| Refinement method                 | Full-matrix least-squares on F <sup>2</sup>         |          |
| Data / restraints / parameters    | 2957 / 0 / 190                                      |          |
| Goodness-of-fit on F <sup>2</sup> | 1.044                                               |          |
| Final R indices [I > 2σ(I)]       | R1 = 0.0362, wR2 = 0.0737                           |          |
| R indices (all data)              | R1 = 0.0420, wR2 = 0.0770                           |          |
| Absolute structure parameter      | 0.01(4)                                             |          |
| Extinction coefficient            | n/a                                                 |          |
| Largest diff. peak and hole       | 0.210 and -0.278 e.Å <sup>-3</sup>                  |          |

**Table S5. Atomic coordinates (  $\times 10^4$ ) and equivalent isotropic displacement parameters ( $\text{\AA}^2 \times 10^3$ ) for PTB\_151206\_A1\_2MB14Fea. U(eq) is defined as one third of the trace of the orthogonalized  $U^{ij}$  tensor.**

|       | x        | y        | z       | U(eq) |
|-------|----------|----------|---------|-------|
| S(1)  | 9153(1)  | 8505(1)  | 3722(1) | 18(1) |
| F(1)  | -1811(3) | 8690(2)  | 1384(1) | 33(1) |
| O(1)  | 6502(3)  | 10245(2) | 2974(1) | 22(1) |
| N(1)  | 10345(3) | 6568(2)  | 4603(1) | 19(1) |
| N(2)  | 7037(3)  | 6688(2)  | 4141(1) | 15(1) |
| C(1)  | 9141(5)  | 5591(2)  | 4835(1) | 18(1) |
| C(2)  | 9722(5)  | 4640(2)  | 5286(2) | 21(1) |
| C(3)  | 8226(5)  | 3786(2)  | 5438(2) | 24(1) |
| C(4)  | 6195(5)  | 3852(2)  | 5143(2) | 23(1) |
| C(5)  | 5580(5)  | 4785(2)  | 4691(1) | 20(1) |
| C(6)  | 7085(4)  | 5644(2)  | 4556(1) | 16(1) |
| C(7)  | 9017(4)  | 7175(2)  | 4205(1) | 17(1) |
| C(8)  | 5655(4)  | 7320(2)  | 3708(1) | 17(1) |
| C(9)  | 6545(4)  | 8310(2)  | 3421(1) | 17(1) |
| C(10) | 5631(4)  | 9281(2)  | 2984(1) | 17(1) |
| C(11) | 3649(4)  | 9085(2)  | 2560(1) | 17(1) |
| C(12) | 3148(5)  | 7993(2)  | 2241(2) | 20(1) |
| C(13) | 1319(5)  | 7860(2)  | 1834(2) | 23(1) |
| C(14) | 26(5)    | 8821(3)  | 1760(2) | 23(1) |
| C(15) | 472(4)   | 9921(2)  | 2057(2) | 21(1) |
| C(16) | 2308(5)  | 10047(2) | 2456(1) | 18(1) |



**Table S6. Bond lengths [Å] and angles [°] for PTB\_151206\_A1\_2MB14Fea.**

---

|                |           |
|----------------|-----------|
| S(1)-C(7)      | 1.731(3)  |
| S(1)-C(9)      | 1.760(3)  |
| F(1)-C(14)     | 1.357(3)  |
| O(1)-C(10)     | 1.221(3)  |
| N(1)-C(1)      | 1.405(3)  |
| N(1)-C(7)      | 1.300(3)  |
| N(2)-C(6)      | 1.391(3)  |
| N(2)-C(7)      | 1.382(3)  |
| N(2)-C(8)      | 1.371(3)  |
| C(1)-C(2)      | 1.391(4)  |
| C(1)-C(6)      | 1.402(4)  |
| C(2)-H(2)      | 0.9500    |
| C(2)-C(3)      | 1.383(4)  |
| C(3)-H(3)      | 0.9500    |
| C(3)-C(4)      | 1.398(4)  |
| C(4)-H(4)      | 0.9500    |
| C(4)-C(5)      | 1.383(4)  |
| C(5)-H(5)      | 0.9500    |
| C(5)-C(6)      | 1.384(4)  |
| C(8)-H(8)      | 0.9500    |
| C(8)-C(9)      | 1.352(4)  |
| C(9)-C(10)     | 1.466(4)  |
| C(10)-C(11)    | 1.488(4)  |
| C(11)-C(12)    | 1.393(4)  |
| C(11)-C(16)    | 1.394(4)  |
| C(12)-H(12)    | 0.9500    |
| C(12)-C(13)    | 1.382(4)  |
| C(13)-H(13)    | 0.9500    |
| C(13)-C(14)    | 1.368(4)  |
| C(14)-C(15)    | 1.378(4)  |
| C(15)-H(15)    | 0.9500    |
| C(15)-C(16)    | 1.377(4)  |
| C(16)-H(16)    | 0.9500    |
| <br>           |           |
| C(7)-S(1)-C(9) | 89.76(13) |
| C(7)-N(1)-C(1) | 102.6(2)  |

|                   |            |
|-------------------|------------|
| C(7)-N(2)-C(6)    | 105.8(2)   |
| C(8)-N(2)-C(6)    | 139.0(2)   |
| C(8)-N(2)-C(7)    | 115.2(2)   |
| C(2)-C(1)-N(1)    | 129.0(3)   |
| C(2)-C(1)-C(6)    | 119.1(3)   |
| C(6)-C(1)-N(1)    | 111.9(2)   |
| C(1)-C(2)-H(2)    | 121.1      |
| C(3)-C(2)-C(1)    | 117.8(3)   |
| C(3)-C(2)-H(2)    | 121.1      |
| C(2)-C(3)-H(3)    | 119.1      |
| C(2)-C(3)-C(4)    | 121.8(3)   |
| C(4)-C(3)-H(3)    | 119.1      |
| C(3)-C(4)-H(4)    | 119.3      |
| C(5)-C(4)-C(3)    | 121.5(3)   |
| C(5)-C(4)-H(4)    | 119.3      |
| C(4)-C(5)-H(5)    | 122.0      |
| C(4)-C(5)-C(6)    | 116.0(3)   |
| C(6)-C(5)-H(5)    | 122.0      |
| N(2)-C(6)-C(1)    | 104.2(2)   |
| C(5)-C(6)-N(2)    | 132.0(3)   |
| C(5)-C(6)-C(1)    | 123.8(3)   |
| N(1)-C(7)-S(1)    | 134.1(2)   |
| N(1)-C(7)-N(2)    | 115.4(2)   |
| N(2)-C(7)-S(1)    | 110.48(19) |
| N(2)-C(8)-H(8)    | 124.0      |
| C(9)-C(8)-N(2)    | 111.9(2)   |
| C(9)-C(8)-H(8)    | 124.0      |
| C(8)-C(9)-S(1)    | 112.6(2)   |
| C(8)-C(9)-C(10)   | 130.7(3)   |
| C(10)-C(9)-S(1)   | 116.3(2)   |
| O(1)-C(10)-C(9)   | 119.5(3)   |
| O(1)-C(10)-C(11)  | 120.7(2)   |
| C(9)-C(10)-C(11)  | 119.8(2)   |
| C(12)-C(11)-C(10) | 122.2(2)   |
| C(12)-C(11)-C(16) | 119.5(3)   |
| C(16)-C(11)-C(10) | 118.2(2)   |
| C(11)-C(12)-H(12) | 119.9      |
| C(13)-C(12)-C(11) | 120.3(3)   |

|                   |          |
|-------------------|----------|
| C(13)-C(12)-H(12) | 119.9    |
| C(12)-C(13)-H(13) | 120.9    |
| C(14)-C(13)-C(12) | 118.2(3) |
| C(14)-C(13)-H(13) | 120.9    |
| F(1)-C(14)-C(13)  | 118.8(3) |
| F(1)-C(14)-C(15)  | 117.7(3) |
| C(13)-C(14)-C(15) | 123.5(3) |
| C(14)-C(15)-H(15) | 121.1    |
| C(16)-C(15)-C(14) | 117.8(3) |
| C(16)-C(15)-H(15) | 121.1    |
| C(11)-C(16)-H(16) | 119.7    |
| C(15)-C(16)-C(11) | 120.6(3) |
| C(15)-C(16)-H(16) | 119.7    |

---

Symmetry transformations used to generate equivalent atoms
